# Supplementary material for: New Solid Forms of Griseofulvin: A Solvate and a Relict Polymorph Related to Reported Solvates
Source: PubMed Central journal article supplement (PMC10704485; doi:10.1021/acs.cgd.3c01011), 2023-11-15
Supplement: cg3c01011_si_001.pdf [file cg3c01011_si_001.pdf]

# New solid forms of griseofulvin: a solvate and a relict polymorph related to reported solvates

*Mariana O. Diniz<sup>1, 2</sup>, Enrico Spoletti<sup>2</sup>, Peuli Ghosh<sup>1, 2</sup>, Matteo Lusi<sup>2</sup>, Michael Svärd<sup>3</sup>, Åke Rasmuson<sup>1,2,3</sup>, Sarah P. Hudson<sup>1, 2\*</sup>*

<sup>1</sup> SSPC, the Science Foundation Ireland Research Centre for Pharmaceuticals, University of Limerick, Limerick, V94 T9PX, Ireland.

<sup>2</sup> Department of Chemical Sciences, Bernal Institute, University of Limerick, Limerick, V94 T9PX, Ireland.

<sup>3</sup> Department of Chemical Engineering, KTH Royal Institute of Technology, Stockholm, SE-100 44, Sweden.

## Supporting information

**Table S1.** Crystallographic parameters of polymorphic forms of GSF.

|                                                     | <i>Form VI</i> |                | <i>Form I</i> | <i>Form II</i> | <i>Form III</i> | <i>Form IV</i> | <i>Form V</i>    |
|-----------------------------------------------------|----------------|----------------|---------------|----------------|-----------------|----------------|------------------|
| <b>CSD code</b>                                     | This work      |                | GRISFL        | GRISFL08       | GRISFL16        | GRISFL22       | GRISFL36         |
| <b>Year discovered</b>                              | This work      |                | 1947[1]       | 2013[2]        | 2013[2]         | 2022[3]        | 2022[3]          |
| <b>Method<sup>a</sup></b>                           | SC             |                | SC            | MC             | MC              | MC             | MC               |
| <b>Year that structure was solved</b>               | This work      |                | 1977[4]       | 2018[5]        | 2020[6]         | 2022[3]        | 2022[3]          |
| <b>T (K)</b>                                        | 150            | 298            | 298           | 298            | 298             | 298            | 298              |
| <b>Crystal system</b>                               | monoclinic     |                | tetragonal    | orthorhombic   | triclinic       | orthorhombic   | monoclinic       |
| <b>Space group</b>                                  | $P2_1$         |                | $P4_1$        | $P2_12_12_1$   | $P1$            | $P2_12_12_1$   | $P2_1$           |
| <b>a (Å)</b>                                        | 9.3824<br>(6)  | 9.4957<br>(4)  | 8.962(1)      | 11.799(8)      | 11.3540<br>(2)  | 8.46010 (1)    | 11.86930<br>(7)  |
| <b>b (Å)</b>                                        | 8.6221<br>(5)  | 8.6772<br>(4)  | 8.962(1)      | 12.007(8)      | 11.9110<br>(2)  | 11.8293 (2)    | 8.43948<br>(4)   |
| <b>c (Å)</b>                                        | 11.8304<br>(7) | 11.8614<br>(5) | 19.895(5)     | 24.359(16)     | 12.7608<br>(2)  | 51.6346 (15)   | 25.72097<br>(14) |
| <b><math>\alpha</math> (°)</b>                      | 90             | 90             | 90            | 90             | 79.8440<br>(10) | 90             | 90               |
| <b><math>\beta</math> (°)</b>                       | 113.240<br>(3) | 113.465<br>(2) | 90            | 90             | 89.1950<br>(10) | 90             | 90.1611<br>(6)   |
| <b><math>\gamma</math> (°)</b>                      | 90             | 90             | 90            | 90             | 83.4730<br>(10) | 90             | 90               |
| <b>V (Å<sup>3</sup>)</b>                            | 879.38<br>(9)  | 896.51<br>(7)  | 1597.92       | 3450.95        | 1687.66         | 5167.99        | 2576.48          |
| <b>Z</b>                                            | 2              | 2              | 4             | 8              | 4               | 12             | 6                |
| <b>Z'</b>                                           | 1              | 1              | 1             | 2              | 4               | 3              | 3                |
| <b><math>v_0</math> (Å<sup>3</sup>)<sup>c</sup></b> | 439.69         | 448.25         | 399.48        | 431.37         | 421.92          | 430.66         | 429.41           |
| <b>d (g cm<sup>-3</sup>)</b>                        | 1.332          | 1.307          | 1.463         | 1.367          | 1.388           | 1.358          | 1.363            |
| <b>T<sub>m</sub> (K)</b>                            | <sup>b</sup>   |                | 494           | 488            | 480             | 478            | 462              |

<sup>a</sup> Methods of polymorph discovery: SC, solution crystallisation; MC, melt crystallisation.

<sup>b</sup> Form VI transformed to Form I before melting.

<sup>c</sup> Molecular volume = cell volume (V) / formula units in unit cell (Z).

**Table S2.** Crystallographic parameters of solvated forms of GSF.

| <i>Solvate</i>                                          | <i>GSF-nBuAc</i><br>(this work)                                                                    | <i>GSF - benzene</i> <sup>a</sup>                                               | <i>GSF - chloroform</i>                                             | <i>GSF - acetonitrile</i>                                                         | <i>GSF - nitromethane</i>                                                         | <i>GSF - nitroethane (2:1)</i>                                                                     | <i>GSF - nitroethane (1:1)</i>                                                                  | <i>GSF - 1,1-dichloroethane</i>                                                                 | <i>GSF - dichloromethane</i>                                                      | <i>GSF - bromochloromethane</i> <sup>a</sup>                           | <i>GSF - dibromomethane</i> <sup>a</sup>                                          | <i>GSF - bromoethane</i> <sup>a</sup>                                              |
|---------------------------------------------------------|----------------------------------------------------------------------------------------------------|---------------------------------------------------------------------------------|---------------------------------------------------------------------|-----------------------------------------------------------------------------------|-----------------------------------------------------------------------------------|----------------------------------------------------------------------------------------------------|-------------------------------------------------------------------------------------------------|-------------------------------------------------------------------------------------------------|-----------------------------------------------------------------------------------|------------------------------------------------------------------------|-----------------------------------------------------------------------------------|------------------------------------------------------------------------------------|
| <b>Chemical Formula</b>                                 | C <sub>17</sub> H <sub>17</sub> ClO <sub>6</sub> ·0.5C <sub>6</sub> H <sub>12</sub> O <sub>2</sub> | C <sub>17</sub> H <sub>17</sub> ClO <sub>6</sub> ·C <sub>6</sub> H <sub>6</sub> | C <sub>17</sub> H <sub>17</sub> ClO <sub>6</sub> ·CHCl <sub>3</sub> | C <sub>17</sub> H <sub>17</sub> ClO <sub>6</sub> ·C <sub>2</sub> H <sub>3</sub> N | C <sub>17</sub> H <sub>17</sub> ClO <sub>6</sub> ·CH <sub>3</sub> NO <sub>2</sub> | C <sub>17</sub> H <sub>17</sub> ClO <sub>6</sub> ·0.5C <sub>2</sub> H <sub>5</sub> NO <sub>2</sub> | C <sub>17</sub> H <sub>17</sub> ClO <sub>6</sub> ·C <sub>2</sub> H <sub>5</sub> NO <sub>2</sub> | C <sub>17</sub> H <sub>17</sub> ClO <sub>6</sub> ·C <sub>2</sub> H <sub>4</sub> Cl <sub>2</sub> | C <sub>17</sub> H <sub>17</sub> ClO <sub>6</sub> ·CH <sub>2</sub> Cl <sub>2</sub> | C <sub>17</sub> H <sub>17</sub> ClO <sub>6</sub> ·CH <sub>2</sub> BrCl | C <sub>17</sub> H <sub>17</sub> ClO <sub>6</sub> ·CH <sub>2</sub> Br <sub>2</sub> | C <sub>17</sub> H <sub>17</sub> ClO <sub>6</sub> ·C <sub>2</sub> H <sub>5</sub> Br |
| <b>MW (g mol<sup>-1</sup>)</b>                          | 410.83                                                                                             | 430.88                                                                          | 472.14                                                              | 393.81                                                                            | 413.80                                                                            | 390.29                                                                                             | 427.83                                                                                          | 451.72                                                                                          | 437.70                                                                            | 482.15                                                                 | 526.60                                                                            | 461.73                                                                             |
| <b>CSD code</b>                                         | This work                                                                                          | GRISBZ                                                                          | MATZEO                                                              | PINMOQ                                                                            | PINMUW                                                                            | PINNAD                                                                                             | PINNEH                                                                                          | VADGOW                                                                                          | VADGUCO <sub>1</sub>                                                              | VADHAJ                                                                 | VADHEN                                                                            | VADHIR                                                                             |
| <b>Year</b>                                             | This work                                                                                          | 1979 [7]                                                                        | 1979[8]                                                             | 2014[9]                                                                           | 2014[9]                                                                           | 2014[9]                                                                                            | 2014[9]                                                                                         | 1988[10]                                                                                        | 2019[11]                                                                          | 1988[10]                                                               | 1988[10]                                                                          | 1988[10]                                                                           |
| <b>T (K)</b>                                            | 150                                                                                                | RT                                                                              | RT                                                                  | 110                                                                               | 110                                                                               | 163                                                                                                | 110                                                                                             | RT                                                                                              | 100                                                                               | RT                                                                     | RT                                                                                | RT                                                                                 |
| <b>Crystal system</b>                                   | Triclinic                                                                                          | Monoclinic                                                                      | Orthorhombic                                                        | Monoclinic                                                                        | Orthorhombic                                                                      | Orthorhombic                                                                                       | Monoclinic                                                                                      | Orthorhombic                                                                                    | Triclinic                                                                         | Triclinic                                                              | Triclinic                                                                         | Triclinic                                                                          |
| <b>Space group</b>                                      | <i>P1</i>                                                                                          | <i>P2<sub>1</sub></i>                                                           | <i>P2<sub>1</sub>2<sub>1</sub>2<sub>1</sub></i>                     | <i>P2<sub>1</sub></i>                                                             | <i>P2<sub>1</sub>2<sub>1</sub>2<sub>1</sub></i>                                   | <i>P2<sub>1</sub>2<sub>1</sub>2<sub>1</sub></i>                                                    | <i>C2</i>                                                                                       | <i>P2<sub>1</sub>2<sub>1</sub>2<sub>1</sub></i>                                                 | <i>P1</i>                                                                         | -                                                                      | -                                                                                 | -                                                                                  |
| <b><i>a</i> (Å)</b>                                     | 8.6087 (3)                                                                                         | 13.28                                                                           | 8.671 (2)                                                           | 11.783 (2)                                                                        | 8.5456 (17)                                                                       | 8.6852 (17)                                                                                        | 21.931 (4)                                                                                      | 11.8995 (1)                                                                                     | 8.5004 (6)                                                                        | 11.754 (5)                                                             | 11.825 (9)                                                                        | 11.819 (5)                                                                         |
| <b><i>b</i> (Å)</b>                                     | 11.7252 (4)                                                                                        | 8.80                                                                            | 11.890 (2)                                                          | 8.5387 (17)                                                                       | 11.740 (2)                                                                        | 15.047 (3)                                                                                         | 8.6541 (17)                                                                                     | 20.720 (3)                                                                                      | 11.6660 (8)                                                                       | 11.908 (6)                                                             | 12.015 (10)                                                                       | 12.009 (6)                                                                         |
| <b><i>c</i> (Å)</b>                                     | 11.7453 (4)                                                                                        | 11.80                                                                           | 20.81 (4)                                                           | 19.297 (4)                                                                        | 19.269 (4)                                                                        | 27.605 (6)                                                                                         | 11.797 (2)                                                                                      | 8.720 (12)                                                                                      | 11.6705 (11)                                                                      | 8.648 (4)                                                              | 8.679 (5)                                                                         | 8.693 (3)                                                                          |
| <b><i>α</i> (°)</b>                                     | 113.2290 (1)                                                                                       | 90                                                                              | 90                                                                  | 90                                                                                | 90                                                                                | 90                                                                                                 | 90                                                                                              | 90                                                                                              | 111.795 (4)                                                                       | 111.18 (3)                                                             | 111.28 (5)                                                                        | 111.19 (4)                                                                         |
| <b><i>β</i> (°)</b>                                     | 90.0600 (1)                                                                                        | 100                                                                             | 90                                                                  | 96.03 (3)                                                                         | 90                                                                                | 90                                                                                                 | 117.57 (3)                                                                                      | 90                                                                                              | 110.833 (3)                                                                       | 89.99 (3)                                                              | 89.69(5)                                                                          | 89.91 (4)                                                                          |
| <b><i>γ</i> (°)</b>                                     | 110.9930 (1)                                                                                       | 90                                                                              | 90                                                                  | 90                                                                                | 90                                                                                | 90                                                                                                 | 90                                                                                              | 90                                                                                              | 94.170 (3)                                                                        | 66.41 (3)                                                              | 65.44(5)                                                                          | 65.67 (4)                                                                          |
| <b><i>V</i> (Å<sup>3</sup>)</b>                         | 1003.04                                                                                            | 1358.00                                                                         | 2145.47                                                             | 1930.76                                                                           | 1933.20                                                                           | 3607.59                                                                                            | 1984.74                                                                                         | 2149.17                                                                                         | 975.973                                                                           | 1019.40                                                                | 1027.14                                                                           | 1031.67                                                                            |
| <b><i>Z</i></b>                                         | 2                                                                                                  | 2                                                                               | 4                                                                   | 4                                                                                 | 4                                                                                 | 8                                                                                                  | 4                                                                                               | 4                                                                                               | 2                                                                                 | -                                                                      | -                                                                                 | -                                                                                  |
| <b><i>Z'</i></b>                                        | 2                                                                                                  | 1                                                                               | 1                                                                   | 2                                                                                 | 1                                                                                 | 2                                                                                                  | 1                                                                                               | 1                                                                                               | 2                                                                                 | -                                                                      | -                                                                                 | -                                                                                  |
| <b><i>v</i><sub>0</sub> (Å<sup>3</sup>)<sup>b</sup></b> | 501.52                                                                                             | 679.00                                                                          | 536.37                                                              | 482.69                                                                            | 483.30                                                                            | 450.95                                                                                             | 496.18                                                                                          | 537.29                                                                                          | 487.99                                                                            | -                                                                      | -                                                                                 | -                                                                                  |
| <b><i>d</i> (g cm<sup>-3</sup>)</b>                     | 1.360                                                                                              | 1.054                                                                           | 1.462                                                               | 1.355                                                                             | 1.422                                                                             | 1.437                                                                                              | 1.432                                                                                           | 1.396                                                                                           | 1.489                                                                             | 1.571                                                                  | 1.703                                                                             | 1.486                                                                              |

<sup>a</sup> No coordinates available. Full crystal structure was not determined.

<sup>b</sup> Molecular volume = cell volume (*V*) / formula units in unit cell (*Z*).

**Table S3.** Intermolecular interaction energies of GSF Form I calculated for a 3.8 Å cluster of molecules using B3LYP/6-31G(d,p). Both the total energy (E(tot)) and electrostatic (E(ele)), polarization (E(pol)), dispersion (E(dis)), and exchange repulsion (E(rep)) components of the energy (kJ/mol) are listed. R indicated the distance between centres of mass of the pair of molecules (Å), the total intermolecular interaction energy for a given molecule is the sum of the electrostatic, polarization, dispersion, and exchange-repulsion components with scale factors of 1.057, 0.740, 0.871, and 0.618, respectively.

|  | N | Symop         | R     | Electron Density | E_ele | E_pol | E_dis | E_rep | E_tot |
|--|---|---------------|-------|------------------|-------|-------|-------|-------|-------|
|  | 2 | y, -x, z+3/4  | 7.01  | B3LYP/6-31G(d,p) | -29.5 | -11.9 | -57.8 | 45.9  | -62.0 |
|  | 2 | -y, x, z+1/4  | 6.77  | B3LYP/6-31G(d,p) | -8.7  | -2.2  | -31.6 | 22.6  | -24.4 |
|  | 2 | x, y, z       | 8.91  | B3LYP/6-31G(d,p) | -2.5  | -1.6  | -19.3 | 7.4   | -16.0 |
|  | 2 | x, y, z       | 8.91  | B3LYP/6-31G(d,p) | -2.1  | -2.3  | -10.9 | 11.4  | -6.4  |
|  | 2 | -x, -y, z+1/2 | 10.50 | B3LYP/6-31G(d,p) | -10.7 | -4.3  | -18.7 | 12.6  | -23.0 |
|  | 2 | y, -x, z+3/4  | 9.78  | B3LYP/6-31G(d,p) | -11.4 | -6.8  | -23.2 | 16.9  | -26.8 |
|  | 2 | -y, x, z+1/4  | 9.61  | B3LYP/6-31G(d,p) | 2.0   | -2.7  | -20.0 | 11.3  | -10.3 |

**Table S4.** Intermolecular interaction energies of GSF Form VI calculated for a 3.8 Å cluster of molecules using B3LYP/6-31G(d,p). Both the total energy (E(tot)) and electrostatic (E(ele)), polarization (E(pol)), dispersion (E(dis)), and exchange repulsion (E(rep)) components of the energy (kJ/mol) are listed. R indicated the distance between centres of mass of the pair of molecules (Å), the total intermolecular interaction energy for a given molecule is the sum of the electrostatic, polarization, dispersion, and exchange-repulsion components with scale factors of 1.057, 0.740, 0.871, and 0.618, respectively.

|  | N | Symop         | R     | Electron Density | E_ele | E_pol | E_dis | E_rep | E_tot |
|--|---|---------------|-------|------------------|-------|-------|-------|-------|-------|
|  | 2 | x, y, z       | 11.85 | B3LYP/6-31G(d,p) | -20.8 | -7.1  | -16.0 | 17.9  | -30.2 |
|  | 2 | -x, y+1/2, -z | 8.05  | B3LYP/6-31G(d,p) | -15.6 | -4.5  | -39.9 | 24.4  | -39.5 |
|  | 2 | -x, y+1/2, -z | 11.94 | B3LYP/6-31G(d,p) | 0.0   | -0.6  | -2.9  | 0.1   | -2.9  |
|  | 2 | x, y, z       | 8.62  | B3LYP/6-31G(d,p) | -2.5  | -3.5  | -15.0 | 17.1  | -7.8  |
|  | 2 | -x, y+1/2, -z | 7.24  | B3LYP/6-31G(d,p) | -15.3 | -3.1  | -28.7 | 23.6  | -28.9 |
|  | 2 | -x, y+1/2, -z | 7.94  | B3LYP/6-31G(d,p) | -12.3 | -5.2  | -32.8 | 22.8  | -31.4 |
|  | 2 | x, y, z       | 9.38  | B3LYP/6-31G(d,p) | 0.9   | -0.7  | -9.9  | 4.4   | -5.4  |

**Table S5.** Intermolecular interaction energies of GSF-nBuAc desolvated calculated for GSF molecule A at 3.8 Å cluster of molecules using B3LYP/6-31G(d,p). Both the total energy (E(tot)) and electrostatic (E(ele)), polarization (E(pol)), dispersion (E(dis)), and exchange repulsion (E(rep)) components of the energy (kJ/mol) are listed. R indicated the distance between centres of mass of the pair of molecules (Å), the total intermolecular interaction energy for a given molecule is the sum of the electrostatic, polarization, dispersion, and exchange-repulsion components with scale factors of 1.057, 0.740, 0.871, and 0.618, respectively.

|  | N | Symop   | R     | Electron Density | E_ele | E_pol | E_dis | E_rep | E_tot |
|--|---|---------|-------|------------------|-------|-------|-------|-------|-------|
|  | 1 | -       | 6.58  | B3LYP/6-31G(d,p) | -6.8  | -1.0  | -35.7 | 19.2  | -27.1 |
|  | 1 | -       | 12.12 | B3LYP/6-31G(d,p) | -4.6  | -2.2  | -5.6  | 0.0   | -11.4 |
|  | 2 | x, y, z | 8.61  | B3LYP/6-31G(d,p) | -1.9  | -3.6  | -15.3 | 17.2  | -7.4  |
|  | 1 | -       | 7.93  | B3LYP/6-31G(d,p) | -15.6 | -5.0  | -28.6 | 19.0  | -33.4 |
|  | 2 | x, y, z | 11.75 | B3LYP/6-31G(d,p) | -19.5 | -7.5  | -15.6 | 17.3  | -29.1 |
|  | 1 | -       | 8.24  | B3LYP/6-31G(d,p) | -16.1 | -4.5  | -40.6 | 26.2  | -39.6 |
|  | 1 | -       | 8.24  | B3LYP/6-31G(d,p) | -15.6 | -4.5  | -40.0 | 25.1  | -39.2 |
|  | 1 | -       | 7.92  | B3LYP/6-31G(d,p) | -16.9 | -5.0  | -29.7 | 21.2  | -34.3 |

**Table S6.** Intermolecular interaction energies of GSF-nBuAc desolvated calculated for GSF molecule B at 3.8 Å cluster of molecules using B3LYP/6-31G(d,p). Both the total energy (E(tot)) and electrostatic (E(ele)), polarization (E(pol)), dispersion (E(dis)), and exchange repulsion (E(rep)) components of the energy (kJ/mol) are listed. R indicated the distance between centres of mass of the pair of molecules (Å), the total intermolecular interaction energy for a given molecule is the sum of the electrostatic, polarization, dispersion, and exchange-repulsion components with scale factors of 1.057, 0.740, 0.871, and 0.618, respectively.

|  | N | Symop   | R     | Electron Density | E_ele | E_pol | E_dis | E_rep | E_tot |
|--|---|---------|-------|------------------|-------|-------|-------|-------|-------|
|  | 1 | -       | 6.58  | B3LYP/6-31G(d,p) | -6.8  | -1.0  | -35.7 | 19.2  | -27.1 |
|  | 1 | -       | 12.12 | B3LYP/6-31G(d,p) | -4.6  | -2.2  | -5.6  | 0.0   | -11.4 |
|  | 0 | x, y, z | 8.61  | B3LYP/6-31G(d,p) | -1.9  | -3.6  | -15.3 | 17.2  | -7.4  |

|   |         |       |                  |       |      |       |      |       |
|---|---------|-------|------------------|-------|------|-------|------|-------|
| 1 | -       | 7.93  | B3LYP/6-31G(d,p) | -15.6 | -5.0 | -28.6 | 19.0 | -33.4 |
| 0 | x, y, z | 11.75 | B3LYP/6-31G(d,p) | -19.5 | -7.5 | -15.6 | 17.3 | -29.1 |
| 1 | -       | 8.24  | B3LYP/6-31G(d,p) | -16.1 | -4.5 | -40.6 | 26.2 | -39.6 |
| 1 | -       | 8.24  | B3LYP/6-31G(d,p) | -15.6 | -4.5 | -40.0 | 25.1 | -39.2 |
| 1 | -       | 7.92  | B3LYP/6-31G(d,p) | -16.9 | -5.0 | -29.7 | 21.2 | -34.3 |
| 2 | x, y, z | 11.75 | B3LYP/6-31G(d,p) | -17.4 | -6.4 | -16.1 | 17.9 | -26.2 |
| 2 | x, y, z | 8.61  | B3LYP/6-31G(d,p) | -2.0  | -3.8 | -15.2 | 17.1 | -7.5  |

**Table S7.** Lattice energy of GSF Form I calculated for a 20 Å cluster of molecules using B3LYP/6-31G(d,p) wavefunction; the total intermolecular interaction energy for a given molecule is the sum of the electrostatic, polarization, dispersion, and exchange-repulsion components with scale factors of 1.057, 0.740, 0.871, and 0.618, respectively.

| N | Symop         | R     | Electron Density | E_ele | E_pol | E_dis | E_rep | E_tot |
|---|---------------|-------|------------------|-------|-------|-------|-------|-------|
| 2 | y, -x, z+3/4  | 25.40 | B3LYP/6-31G(d,p) | 0.2   | -0.0  | -0.0  | 0.0   | 0.2   |
| 2 | -x, -y, z+1/2 | 23.66 | B3LYP/6-31G(d,p) | 0.0   | -0.0  | -0.0  | 0.0   | 0.0   |
| 2 | -y, x, z+1/4  | 24.19 | B3LYP/6-31G(d,p) | 0.1   | -0.0  | -0.0  | 0.0   | 0.1   |
| 2 | x, y, z       | 25.21 | B3LYP/6-31G(d,p) | 0.2   | -0.0  | -0.0  | 0.0   | 0.2   |
| 2 | y, -x, z+3/4  | 18.00 | B3LYP/6-31G(d,p) | 0.4   | -0.0  | -0.1  | 0.0   | 0.3   |
| 2 | -y, x, z+1/4  | 24.95 | B3LYP/6-31G(d,p) | -0.1  | -0.0  | -0.0  | 0.0   | -0.1  |
| 2 | -y, x, z+1/4  | 27.90 | B3LYP/6-31G(d,p) | -0.0  | -0.0  | -0.0  | 0.0   | -0.1  |
| 2 | -x, -y, z+1/2 | 26.94 | B3LYP/6-31G(d,p) | 0.0   | -0.0  | -0.0  | 0.0   | 0.0   |
| 2 | -x, -y, z+1/2 | 19.27 | B3LYP/6-31G(d,p) | 0.0   | -0.0  | -0.0  | 0.0   | 0.0   |
| 2 | y, -x, z+3/4  | 23.08 | B3LYP/6-31G(d,p) | 0.5   | -0.0  | -0.0  | 0.0   | 0.5   |
| 2 | x, y, z       | 28.19 | B3LYP/6-31G(d,p) | 0.1   | -0.0  | -0.0  | 0.0   | 0.1   |
| 2 | x, y, z       | 19.93 | B3LYP/6-31G(d,p) | 0.4   | -0.0  | -0.0  | 0.0   | 0.4   |
| 2 | -y, x, z+1/4  | 20.73 | B3LYP/6-31G(d,p) | 0.1   | -0.0  | -0.0  | 0.0   | 0.0   |

|   |               |       |                  |      |      |      |     |      |
|---|---------------|-------|------------------|------|------|------|-----|------|
| 2 | y, -x, z+3/4  | 14.54 | B3LYP/6-31G(d,p) | 2.5  | -0.1 | -0.4 | 0.0 | 2.3  |
| 2 | y, -x, z+3/4  | 20.11 | B3LYP/6-31G(d,p) | -0.1 | -0.0 | -0.0 | 0.0 | -0.1 |
| 2 | y, -x, z+3/4  | 28.95 | B3LYP/6-31G(d,p) | -0.0 | -0.0 | -0.0 | 0.0 | -0.0 |
| 2 | -y, x, z+1/4  | 25.02 | B3LYP/6-31G(d,p) | -0.1 | -0.0 | -0.0 | 0.0 | -0.1 |
| 2 | -x, -y, z+1/2 | 26.38 | B3LYP/6-31G(d,p) | 0.0  | -0.0 | -0.0 | 0.0 | 0.0  |
| 2 | -x, -y, z+1/2 | 18.49 | B3LYP/6-31G(d,p) | -0.2 | -0.0 | -0.1 | 0.0 | -0.3 |
| 2 | x, y, z       | 26.53 | B3LYP/6-31G(d,p) | -0.4 | -0.0 | -0.0 | 0.0 | -0.5 |
| 2 | y, -x, z+3/4  | 24.07 | B3LYP/6-31G(d,p) | 0.4  | -0.0 | -0.0 | 0.0 | 0.4  |
| 2 | x, y, z       | 26.74 | B3LYP/6-31G(d,p) | 0.1  | -0.0 | -0.0 | 0.0 | 0.1  |
| 2 | x, y, z       | 17.83 | B3LYP/6-31G(d,p) | 0.4  | -0.0 | -0.1 | 0.0 | 0.3  |
| 2 | -y, x, z+1/4  | 20.81 | B3LYP/6-31G(d,p) | 0.2  | -0.0 | -0.0 | 0.0 | 0.2  |
| 2 | y, -x, z+3/4  | 16.06 | B3LYP/6-31G(d,p) | 1.0  | -0.1 | -0.2 | 0.0 | 0.8  |
| 2 | y, -x, z+3/4  | 26.94 | B3LYP/6-31G(d,p) | 0.1  | -0.0 | -0.0 | 0.0 | 0.1  |
| 2 | -x, -y, z+1/2 | 21.71 | B3LYP/6-31G(d,p) | 0.3  | -0.0 | -0.0 | 0.0 | 0.3  |
| 2 | -y, x, z+1/4  | 28.08 | B3LYP/6-31G(d,p) | -0.1 | -0.0 | -0.0 | 0.0 | -0.1 |
| 2 | y, -x, z+3/4  | 28.01 | B3LYP/6-31G(d,p) | 0.1  | -0.0 | -0.0 | 0.0 | 0.1  |
| 2 | x, y, z       | 19.93 | B3LYP/6-31G(d,p) | 0.1  | -0.0 | -0.0 | 0.0 | 0.0  |
| 2 | x, y, z       | 28.19 | B3LYP/6-31G(d,p) | 0.0  | -0.0 | -0.0 | 0.0 | 0.0  |
| 2 | -y, x, z+1/4  | 24.40 | B3LYP/6-31G(d,p) | 0.2  | -0.0 | -0.0 | 0.0 | 0.2  |
| 2 | y, -x, z+3/4  | 21.53 | B3LYP/6-31G(d,p) | -0.3 | -0.0 | -0.0 | 0.0 | -0.3 |
| 2 | -y, x, z+1/4  | 22.51 | B3LYP/6-31G(d,p) | -0.1 | -0.0 | -0.0 | 0.0 | -0.1 |
| 2 | -y, x, z+1/4  | 28.66 | B3LYP/6-31G(d,p) | -0.0 | -0.0 | -0.0 | 0.0 | -0.0 |
| 2 | -x, -y, z+1/2 | 19.10 | B3LYP/6-31G(d,p) | 0.1  | -0.0 | -0.0 | 0.0 | 0.0  |
| 2 | x, y, z       | 19.93 | B3LYP/6-31G(d,p) | 0.2  | -0.0 | -0.0 | 0.0 | 0.1  |

|   |               |       |                  |       |       |       |      |       |
|---|---------------|-------|------------------|-------|-------|-------|------|-------|
| 2 | -y, x, z+1/4  | 17.71 | B3LYP/6-31G(d,p) | 0.2   | -0.0  | -0.0  | 0.0  | 0.2   |
| 2 | -y, x, z+1/4  | 25.06 | B3LYP/6-31G(d,p) | 0.1   | -0.0  | -0.0  | 0.0  | 0.1   |
| 2 | y, -x, z+3/4  | 12.71 | B3LYP/6-31G(d,p) | 0.5   | -0.0  | -0.5  | 0.0  | 0.1   |
| 2 | y, -x, z+3/4  | 22.74 | B3LYP/6-31G(d,p) | -0.2  | -0.0  | -0.0  | 0.0  | -0.2  |
| 2 | y, -x, z+3/4  | 18.83 | B3LYP/6-31G(d,p) | -0.4  | -0.0  | -0.0  | 0.0  | -0.5  |
| 2 | x, y, z       | 27.99 | B3LYP/6-31G(d,p) | -0.1  | -0.0  | -0.0  | 0.0  | -0.2  |
| 2 | y, -x, z+3/4  | 28.12 | B3LYP/6-31G(d,p) | -0.1  | -0.0  | -0.0  | 0.0  | -0.1  |
| 2 | x, y, z       | 23.35 | B3LYP/6-31G(d,p) | -0.2  | -0.0  | -0.0  | 0.0  | -0.2  |
| 2 | -y, x, z+1/4  | 18.74 | B3LYP/6-31G(d,p) | -0.7  | -0.0  | -0.1  | 0.0  | -0.8  |
| 2 | -x, -y, z+1/2 | 13.27 | B3LYP/6-31G(d,p) | 0.9   | -0.0  | -0.4  | 0.0  | 0.6   |
| 2 | x, y, z       | 12.61 | B3LYP/6-31G(d,p) | -0.0  | -0.1  | -0.6  | 0.0  | -0.7  |
| 2 | -y, x, z+1/4  | 12.58 | B3LYP/6-31G(d,p) | -0.1  | -0.0  | -0.5  | 0.0  | -0.5  |
| 2 | y, -x, z+3/4  | 7.01  | B3LYP/6-31G(d,p) | -29.5 | -11.9 | -57.8 | 45.9 | -62.0 |
| 2 | x, y, z       | 23.35 | B3LYP/6-31G(d,p) | 0.1   | -0.0  | -0.0  | 0.0  | 0.1   |
| 2 | y, -x, z+3/4  | 15.56 | B3LYP/6-31G(d,p) | -1.4  | -0.1  | -0.2  | 0.0  | -1.6  |
| 2 | y, -x, z+3/4  | 28.94 | B3LYP/6-31G(d,p) | -0.3  | -0.0  | -0.0  | 0.0  | -0.3  |
| 2 | x, y, z       | 21.58 | B3LYP/6-31G(d,p) | -0.8  | -0.0  | -0.0  | 0.0  | -0.9  |
| 2 | -x, -y, z+1/2 | 12.11 | B3LYP/6-31G(d,p) | -0.3  | -0.4  | -1.1  | 0.0  | -1.5  |
| 2 | x, y, z       | 8.91  | B3LYP/6-31G(d,p) | -2.5  | -1.6  | -19.3 | 7.4  | -16.0 |
| 2 | y, -x, z+3/4  | 9.78  | B3LYP/6-31G(d,p) | -11.4 | -6.8  | -23.2 | 16.9 | -26.8 |
| 2 | y, -x, z+3/4  | 21.24 | B3LYP/6-31G(d,p) | 0.2   | -0.0  | -0.0  | 0.0  | 0.2   |
| 2 | x, y, z       | 21.58 | B3LYP/6-31G(d,p) | 0.2   | -0.0  | -0.0  | 0.0  | 0.2   |
| 2 | x, y, z       | 26.53 | B3LYP/6-31G(d,p) | 0.1   | -0.0  | -0.0  | 0.0  | 0.2   |
| 2 | y, -x, z+3/4  | 16.99 | B3LYP/6-31G(d,p) | -0.1  | -0.0  | -0.1  | 0.0  | -0.2  |



|   |               |       |                  |      |      |      |     |      |
|---|---------------|-------|------------------|------|------|------|-----|------|
| 2 | x, y, z       | 27.99 | B3LYP/6-31G(d,p) | -0.4 | -0.0 | -0.0 | 0.0 | -0.5 |
| 2 | x, y, z       | 23.35 | B3LYP/6-31G(d,p) | -0.7 | -0.0 | -0.0 | 0.0 | -0.8 |
| 2 | -x, -y, z+1/2 | 16.61 | B3LYP/6-31G(d,p) | 0.0  | -0.1 | -0.1 | 0.0 | -0.1 |
| 2 | x, y, z       | 12.61 | B3LYP/6-31G(d,p) | 1.5  | -0.2 | -0.6 | 0.0 | 0.9  |
| 2 | x, y, z       | 25.21 | B3LYP/6-31G(d,p) | 0.1  | -0.0 | -0.0 | 0.0 | 0.1  |
| 2 | y, -x, z+3/4  | 17.35 | B3LYP/6-31G(d,p) | -1.0 | -0.0 | -0.1 | 0.0 | -1.1 |
| 2 | x, y, z       | 23.35 | B3LYP/6-31G(d,p) | 0.2  | -0.0 | -0.0 | 0.0 | 0.2  |
| 2 | y, -x, z+3/4  | 22.23 | B3LYP/6-31G(d,p) | 0.2  | -0.0 | -0.0 | 0.0 | 0.2  |
| 2 | -x, -y, z+1/2 | 23.75 | B3LYP/6-31G(d,p) | 0.2  | -0.0 | -0.0 | 0.0 | 0.2  |
| 2 | x, y, z       | 19.93 | B3LYP/6-31G(d,p) | 0.4  | -0.0 | -0.0 | 0.0 | 0.4  |
| 2 | y, -x, z+3/4  | 25.62 | B3LYP/6-31G(d,p) | 0.2  | -0.0 | -0.0 | 0.0 | 0.2  |
| 2 | -y, x, z+1/4  | 22.71 | B3LYP/6-31G(d,p) | 0.2  | -0.0 | -0.0 | 0.0 | 0.2  |
| 2 | -x, -y, z+1/2 | 26.00 | B3LYP/6-31G(d,p) | 0.0  | -0.0 | -0.0 | 0.0 | 0.0  |
| 2 | x, y, z       | 27.99 | B3LYP/6-31G(d,p) | 0.0  | -0.0 | -0.0 | 0.0 | -0.0 |
| 2 | -y, x, z+1/4  | 19.86 | B3LYP/6-31G(d,p) | -0.3 | -0.0 | -0.0 | 0.0 | -0.4 |
| 2 | -y, x, z+1/4  | 26.63 | B3LYP/6-31G(d,p) | -0.1 | -0.0 | -0.0 | 0.0 | -0.1 |
| 2 | -x, -y, z+1/2 | 18.12 | B3LYP/6-31G(d,p) | 0.0  | -0.0 | -0.0 | 0.0 | -0.0 |
| 2 | x, y, z       | 17.83 | B3LYP/6-31G(d,p) | 0.4  | -0.0 | -0.0 | 0.0 | 0.4  |
| 2 | -y, x, z+1/4  | 14.19 | B3LYP/6-31G(d,p) | 0.6  | -0.0 | -0.2 | 0.0 | 0.5  |
| 2 | x, y, z       | 26.53 | B3LYP/6-31G(d,p) | -0.1 | -0.0 | -0.0 | 0.0 | -0.1 |
| 2 | y, -x, z+3/4  | 25.07 | B3LYP/6-31G(d,p) | -0.2 | -0.0 | -0.0 | 0.0 | -0.2 |
| 2 | x, y, z       | 21.58 | B3LYP/6-31G(d,p) | 0.0  | -0.0 | -0.0 | 0.0 | 0.0  |
| 2 | -y, x, z+1/4  | 15.46 | B3LYP/6-31G(d,p) | -1.5 | -0.1 | -0.3 | 0.0 | -1.9 |
| 2 | -x, -y, z+1/2 | 11.82 | B3LYP/6-31G(d,p) | -0.4 | -0.1 | -1.5 | 0.0 | -1.8 |

|   |               |       |                  |       |      |       |      |       |
|---|---------------|-------|------------------|-------|------|-------|------|-------|
| 2 | y, -x, z+3/4  | 25.00 | B3LYP/6-31G(d,p) | -0.1  | -0.0 | -0.0  | 0.0  | -0.1  |
| 2 | x, y, z       | 8.91  | B3LYP/6-31G(d,p) | -2.1  | -2.3 | -10.9 | 11.4 | -6.4  |
| 2 | -y, x, z+1/4  | 6.77  | B3LYP/6-31G(d,p) | -8.7  | -2.2 | -31.6 | 22.6 | -24.4 |
| 2 | x, y, z       | 21.58 | B3LYP/6-31G(d,p) | -0.2  | -0.0 | -0.0  | 0.0  | -0.3  |
| 2 | y, -x, z+3/4  | 25.98 | B3LYP/6-31G(d,p) | -0.4  | -0.0 | -0.0  | 0.0  | -0.5  |
| 2 | x, y, z       | 19.65 | B3LYP/6-31G(d,p) | -0.2  | -0.0 | -0.0  | 0.0  | -0.3  |
| 2 | -x, -y, z+1/2 | 10.50 | B3LYP/6-31G(d,p) | -10.7 | -4.3 | -18.7 | 12.6 | -23.0 |
| 2 | y, -x, z+3/4  | 25.92 | B3LYP/6-31G(d,p) | -0.2  | -0.0 | -0.0  | 0.0  | -0.2  |
| 2 | y, -x, z+3/4  | 9.61  | B3LYP/6-31G(d,p) | 2.0   | -2.7 | -20.0 | 11.3 | -10.3 |
| 2 | y, -x, z+3/4  | 16.89 | B3LYP/6-31G(d,p) | -0.1  | -0.0 | -0.1  | 0.0  | -0.3  |
| 2 | y, -x, z+3/4  | 29.67 | B3LYP/6-31G(d,p) | -0.4  | -0.0 | -0.0  | 0.0  | -0.4  |
| 2 | -x, -y, z+1/2 | 15.48 | B3LYP/6-31G(d,p) | -2.3  | -0.1 | -0.2  | 0.0  | -2.7  |
| 2 | x, y, z       | 27.99 | B3LYP/6-31G(d,p) | -0.2  | -0.0 | -0.0  | 0.0  | -0.2  |
| 2 | y, -x, z+3/4  | 17.25 | B3LYP/6-31G(d,p) | 0.6   | -0.0 | -0.1  | 0.0  | 0.5   |
| 2 | y, -x, z+3/4  | 22.15 | B3LYP/6-31G(d,p) | 0.2   | -0.0 | -0.0  | 0.0  | 0.2   |
| 2 | -x, -y, z+1/2 | 22.98 | B3LYP/6-31G(d,p) | -0.2  | -0.0 | -0.0  | 0.0  | -0.2  |
| 2 | y, -x, z+3/4  | 25.80 | B3LYP/6-31G(d,p) | -0.1  | -0.0 | -0.0  | 0.0  | -0.1  |
| 2 | x, y, z       | 26.53 | B3LYP/6-31G(d,p) | 0.1   | -0.0 | -0.0  | 0.0  | 0.1   |
| 2 | x, y, z       | 26.74 | B3LYP/6-31G(d,p) | 0.1   | -0.0 | -0.0  | 0.0  | 0.1   |
| 2 | -y, x, z+1/4  | 23.71 | B3LYP/6-31G(d,p) | 0.2   | -0.0 | -0.0  | 0.0  | 0.2   |
| 2 | -y, x, z+1/4  | 21.00 | B3LYP/6-31G(d,p) | -0.1  | -0.0 | -0.0  | 0.0  | -0.1  |
| 2 | -y, x, z+1/4  | 27.48 | B3LYP/6-31G(d,p) | -0.0  | -0.0 | -0.0  | 0.0  | -0.0  |
| 2 | -x, -y, z+1/2 | 21.23 | B3LYP/6-31G(d,p) | 0.0   | -0.0 | -0.0  | 0.0  | -0.0  |
| 2 | -y, x, z+1/4  | 15.74 | B3LYP/6-31G(d,p) | 0.9   | -0.0 | -0.1  | 0.0  | 0.9   |

|   |               |       |                  |      |      |      |     |      |
|---|---------------|-------|------------------|------|------|------|-----|------|
| 2 | -y, x, z+1/4  | 28.76 | B3LYP/6-31G(d,p) | -0.0 | -0.0 | -0.0 | 0.0 | -0.0 |
| 2 | -x, -y, z+1/2 | 16.20 | B3LYP/6-31G(d,p) | 0.1  | -0.0 | -0.2 | 0.0 | -0.1 |
| 2 | -x, -y, z+1/2 | 15.26 | B3LYP/6-31G(d,p) | 0.5  | -0.1 | -0.2 | 0.0 | 0.2  |
| 2 | y, -x, z+3/4  | 29.61 | B3LYP/6-31G(d,p) | -0.2 | -0.0 | -0.0 | 0.0 | -0.2 |
| 2 | -x, -y, z+1/2 | 19.03 | B3LYP/6-31G(d,p) | -0.1 | -0.0 | -0.0 | 0.0 | -0.1 |
| 2 | y, -x, z+3/4  | 21.29 | B3LYP/6-31G(d,p) | 0.5  | -0.0 | -0.0 | 0.0 | 0.5  |
| 2 | y, -x, z+3/4  | 25.42 | B3LYP/6-31G(d,p) | 0.1  | -0.0 | -0.0 | 0.0 | 0.1  |
| 2 | -x, -y, z+1/2 | 25.50 | B3LYP/6-31G(d,p) | -0.0 | -0.0 | -0.0 | 0.0 | -0.1 |
| 2 | y, -x, z+3/4  | 25.73 | B3LYP/6-31G(d,p) | 0.1  | -0.0 | -0.0 | 0.0 | 0.1  |
| 2 | -y, x, z+1/4  | 27.71 | B3LYP/6-31G(d,p) | 0.2  | -0.0 | -0.0 | 0.0 | 0.2  |
| 2 | -x, -y, z+1/2 | 27.06 | B3LYP/6-31G(d,p) | 0.1  | -0.0 | -0.0 | 0.0 | 0.1  |
| 2 | -x, -y, z+1/2 | 23.32 | B3LYP/6-31G(d,p) | 0.2  | -0.0 | -0.0 | 0.0 | 0.2  |
| 2 | -x, -y, z+1/2 | 22.68 | B3LYP/6-31G(d,p) | 0.3  | -0.0 | -0.0 | 0.0 | 0.3  |
| 2 | -x, -y, z+1/2 | 25.37 | B3LYP/6-31G(d,p) | 0.2  | -0.0 | -0.0 | 0.0 | 0.2  |
| 2 | y, -x, z+3/4  | 28.59 | B3LYP/6-31G(d,p) | 0.2  | -0.0 | -0.0 | 0.0 | 0.2  |

**Table S8.** Lattice energy of GSF Form VI calculated for a 20 Å cluster of molecules using B3LYP/6-31G(d,p) wavefunction; the total intermolecular interaction energy for a given molecule is the sum of the electrostatic, polarization, dispersion, and exchange-repulsion components with scale factors of 1.057, 0.740, 0.871, and 0.618, respectively.

| N | Symop         | R     | Electron Density | E_ele | E_pol | E_dis | E_rep | E_tot |
|---|---------------|-------|------------------|-------|-------|-------|-------|-------|
| 2 | x, y, z       | 27.27 | B3LYP/6-31G(d,p) | 0.0   | -0.0  | -0.0  | 0.0   | 0.0   |
| 2 | -x, y+1/2, -z | 29.25 | B3LYP/6-31G(d,p) | 0.2   | -0.0  | -0.0  | 0.0   | 0.2   |
| 2 | x, y, z       | 28.75 | B3LYP/6-31G(d,p) | -0.3  | -0.0  | -0.0  | 0.0   | -0.3  |
| 2 | x, y, z       | 25.87 | B3LYP/6-31G(d,p) | 0.1   | -0.0  | -0.0  | 0.0   | 0.1   |
| 2 | -x, y+1/2, -z | 19.91 | B3LYP/6-31G(d,p) | -0.0  | -0.0  | -0.0  | 0.0   | -0.1  |

|   |               |       |                  |      |      |      |     |      |
|---|---------------|-------|------------------|------|------|------|-----|------|
| 2 | -x, y+1/2, -z | 25.73 | B3LYP/6-31G(d,p) | 0.2  | -0.0 | -0.0 | 0.0 | 0.2  |
| 2 | x, y, z       | 29.31 | B3LYP/6-31G(d,p) | -0.2 | -0.0 | -0.0 | 0.0 | -0.2 |
| 2 | -x, y+1/2, -z | 22.27 | B3LYP/6-31G(d,p) | 0.2  | -0.0 | -0.0 | 0.0 | 0.2  |
| 2 | -x, y+1/2, -z | 30.97 | B3LYP/6-31G(d,p) | -0.0 | -0.0 | -0.0 | 0.0 | -0.0 |
| 2 | x, y, z       | 24.78 | B3LYP/6-31G(d,p) | 0.0  | -0.0 | -0.0 | 0.0 | 0.0  |
| 2 | -x, y+1/2, -z | 23.34 | B3LYP/6-31G(d,p) | -0.2 | -0.0 | -0.0 | 0.0 | -0.2 |
| 2 | -x, y+1/2, -z | 17.06 | B3LYP/6-31G(d,p) | -0.9 | -0.0 | -0.1 | 0.0 | -1.0 |
| 2 | -x, y+1/2, -z | 22.66 | B3LYP/6-31G(d,p) | 0.8  | -0.0 | -0.0 | 0.0 | 0.9  |
| 2 | x, y, z       | 25.22 | B3LYP/6-31G(d,p) | -0.6 | -0.0 | -0.0 | 0.0 | -0.6 |
| 2 | x, y, z       | 19.78 | B3LYP/6-31G(d,p) | -0.1 | -0.0 | -0.0 | 0.0 | -0.1 |
| 2 | x, y, z       | 30.01 | B3LYP/6-31G(d,p) | -0.2 | -0.0 | -0.0 | 0.0 | -0.2 |
| 2 | -x, y+1/2, -z | 30.17 | B3LYP/6-31G(d,p) | 0.4  | -0.0 | -0.0 | 0.0 | 0.4  |
| 2 | -x, y+1/2, -z | 18.63 | B3LYP/6-31G(d,p) | 1.7  | -0.1 | -0.1 | 0.0 | 1.7  |
| 2 | x, y, z       | 20.65 | B3LYP/6-31G(d,p) | 0.3  | -0.0 | -0.0 | 0.0 | 0.3  |
| 2 | -x, y+1/2, -z | 11.94 | B3LYP/6-31G(d,p) | 0.0  | -0.6 | -2.9 | 0.1 | -2.9 |
| 2 | -x, y+1/2, -z | 19.14 | B3LYP/6-31G(d,p) | -0.5 | -0.0 | -0.0 | 0.0 | -0.6 |
| 2 | -x, y+1/2, -z | 14.75 | B3LYP/6-31G(d,p) | -0.8 | -0.0 | -0.1 | 0.0 | -1.0 |
| 2 | -x, y+1/2, -z | 23.64 | B3LYP/6-31G(d,p) | -0.3 | -0.0 | -0.0 | 0.0 | -0.3 |
| 2 | x, y, z       | 23.70 | B3LYP/6-31G(d,p) | -0.9 | -0.0 | -0.0 | 0.0 | -0.9 |
| 2 | x, y, z       | 17.80 | B3LYP/6-31G(d,p) | 0.1  | -0.0 | -0.1 | 0.0 | -0.0 |
| 2 | x, y, z       | 18.76 | B3LYP/6-31G(d,p) | 0.5  | -0.0 | -0.0 | 0.0 | 0.5  |
| 2 | -x, y+1/2, -z | 23.93 | B3LYP/6-31G(d,p) | -0.2 | -0.0 | -0.0 | 0.0 | -0.2 |
| 2 | x, y, z       | 25.22 | B3LYP/6-31G(d,p) | -0.4 | -0.0 | -0.0 | 0.0 | -0.5 |
| 2 | x, y, z       | 19.78 | B3LYP/6-31G(d,p) | -0.0 | -0.0 | -0.0 | 0.0 | -0.1 |

|   |               |       |                  |       |      |       |      |       |
|---|---------------|-------|------------------|-------|------|-------|------|-------|
| 2 | x, y, z       | 20.65 | B3LYP/6-31G(d,p) | 0.3   | -0.0 | -0.0  | 0.0  | 0.3   |
| 2 | x, y, z       | 27.27 | B3LYP/6-31G(d,p) | 0.1   | -0.0 | -0.0  | 0.0  | 0.1   |
| 2 | x, y, z       | 24.78 | B3LYP/6-31G(d,p) | 0.0   | -0.0 | -0.0  | 0.0  | 0.0   |
| 2 | x, y, z       | 25.48 | B3LYP/6-31G(d,p) | 0.2   | -0.0 | -0.0  | 0.0  | 0.2   |
| 2 | -x, y+1/2, -z | 22.60 | B3LYP/6-31G(d,p) | -0.3  | -0.0 | -0.0  | 0.0  | -0.4  |
| 2 | x, y, z       | 20.92 | B3LYP/6-31G(d,p) | 0.2   | -0.0 | -0.0  | 0.0  | 0.1   |
| 2 | -x, y+1/2, -z | 28.16 | B3LYP/6-31G(d,p) | -0.1  | -0.0 | -0.0  | 0.0  | -0.1  |
| 2 | x, y, z       | 27.75 | B3LYP/6-31G(d,p) | -0.1  | -0.0 | -0.0  | 0.0  | -0.1  |
| 2 | -x, y+1/2, -z | 22.49 | B3LYP/6-31G(d,p) | -0.0  | -0.0 | -0.0  | 0.0  | -0.0  |
| 2 | x, y, z       | 19.63 | B3LYP/6-31G(d,p) | 0.4   | -0.0 | -0.0  | 0.0  | 0.4   |
| 2 | -x, y+1/2, -z | 24.26 | B3LYP/6-31G(d,p) | -0.3  | -0.0 | -0.0  | 0.0  | -0.3  |
| 2 | -x, y+1/2, -z | 14.61 | B3LYP/6-31G(d,p) | -1.5  | -0.0 | -0.3  | 0.0  | -1.9  |
| 2 | -x, y+1/2, -z | 22.32 | B3LYP/6-31G(d,p) | -0.2  | -0.0 | -0.0  | 0.0  | -0.3  |
| 2 | x, y, z       | 25.48 | B3LYP/6-31G(d,p) | 0.2   | -0.0 | -0.0  | 0.0  | 0.2   |
| 2 | -x, y+1/2, -z | 14.18 | B3LYP/6-31G(d,p) | -0.5  | -0.0 | -0.2  | 0.0  | -0.8  |
| 2 | x, y, z       | 24.76 | B3LYP/6-31G(d,p) | 0.2   | -0.0 | -0.0  | 0.0  | 0.2   |
| 2 | -x, y+1/2, -z | 21.65 | B3LYP/6-31G(d,p) | -0.0  | -0.0 | -0.0  | 0.0  | -0.0  |
| 2 | x, y, z       | 23.39 | B3LYP/6-31G(d,p) | -0.5  | -0.0 | -0.0  | 0.0  | -0.5  |
| 2 | x, y, z       | 14.65 | B3LYP/6-31G(d,p) | -0.8  | -0.3 | -0.8  | 0.0  | -1.8  |
| 2 | -x, y+1/2, -z | 28.84 | B3LYP/6-31G(d,p) | 0.3   | -0.0 | -0.0  | 0.0  | 0.3   |
| 2 | -x, y+1/2, -z | 18.90 | B3LYP/6-31G(d,p) | 0.3   | -0.0 | -0.0  | 0.0  | 0.3   |
| 2 | x, y, z       | 12.74 | B3LYP/6-31G(d,p) | 0.9   | -0.0 | -0.5  | 0.0  | 0.5   |
| 2 | -x, y+1/2, -z | 8.05  | B3LYP/6-31G(d,p) | -15.6 | -4.5 | -39.9 | 24.4 | -39.5 |
| 2 | x, y, z       | 19.75 | B3LYP/6-31G(d,p) | 0.3   | -0.0 | -0.0  | 0.0  | 0.3   |

|   |               |       |                  |       |      |       |      |       |
|---|---------------|-------|------------------|-------|------|-------|------|-------|
| 2 | -x, y+1/2, -z | 7.24  | B3LYP/6-31G(d,p) | -15.3 | -3.1 | -28.7 | 23.6 | -28.9 |
| 2 | x, y, z       | 27.23 | B3LYP/6-31G(d,p) | 0.2   | -0.0 | -0.0  | 0.0  | 0.2   |
| 2 | -x, y+1/2, -z | 17.89 | B3LYP/6-31G(d,p) | -0.0  | -0.0 | -0.1  | 0.0  | -0.1  |
| 2 | x, y, z       | 21.74 | B3LYP/6-31G(d,p) | -0.8  | -0.0 | -0.0  | 0.0  | -0.9  |
| 2 | x, y, z       | 11.85 | B3LYP/6-31G(d,p) | -20.8 | -7.1 | -16.0 | 17.9 | -30.2 |
| 2 | x, y, z       | 9.38  | B3LYP/6-31G(d,p) | 0.9   | -0.7 | -9.9  | 4.4  | -5.4  |
| 2 | x, y, z       | 17.76 | B3LYP/6-31G(d,p) | 0.4   | -0.0 | -0.0  | 0.0  | 0.4   |
| 2 | x, y, z       | 25.83 | B3LYP/6-31G(d,p) | 0.2   | -0.0 | -0.0  | 0.0  | 0.2   |
| 2 | x, y, z       | 23.39 | B3LYP/6-31G(d,p) | -0.4  | -0.0 | -0.0  | 0.0  | -0.4  |
| 2 | x, y, z       | 14.65 | B3LYP/6-31G(d,p) | -1.1  | -0.1 | -0.3  | 0.0  | -1.5  |
| 2 | x, y, z       | 12.74 | B3LYP/6-31G(d,p) | 0.4   | -0.1 | -0.4  | 0.0  | 0.0   |
| 2 | x, y, z       | 19.75 | B3LYP/6-31G(d,p) | 0.3   | -0.0 | -0.0  | 0.0  | 0.3   |
| 2 | x, y, z       | 20.92 | B3LYP/6-31G(d,p) | 0.0   | -0.0 | -0.0  | 0.0  | 0.0   |
| 2 | x, y, z       | 27.75 | B3LYP/6-31G(d,p) | -0.1  | -0.0 | -0.0  | 0.0  | -0.1  |
| 2 | x, y, z       | 19.63 | B3LYP/6-31G(d,p) | 0.3   | -0.0 | -0.0  | 0.0  | 0.3   |
| 2 | x, y, z       | 24.76 | B3LYP/6-31G(d,p) | 0.2   | -0.0 | -0.0  | 0.0  | 0.2   |
| 2 | -x, y+1/2, -z | 22.56 | B3LYP/6-31G(d,p) | -0.2  | -0.0 | -0.0  | 0.0  | -0.2  |
| 2 | x, y, z       | 25.87 | B3LYP/6-31G(d,p) | 0.2   | -0.0 | -0.0  | 0.0  | 0.2   |
| 2 | x, y, z       | 20.91 | B3LYP/6-31G(d,p) | 0.3   | -0.0 | -0.0  | 0.0  | 0.3   |
| 2 | -x, y+1/2, -z | 28.34 | B3LYP/6-31G(d,p) | -0.1  | -0.0 | -0.0  | 0.0  | -0.1  |
| 2 | x, y, z       | 17.24 | B3LYP/6-31G(d,p) | 0.6   | -0.0 | -0.1  | 0.0  | 0.5   |
| 2 | -x, y+1/2, -z | 24.68 | B3LYP/6-31G(d,p) | -0.2  | -0.0 | -0.0  | 0.0  | -0.2  |
| 2 | -x, y+1/2, -z | 17.66 | B3LYP/6-31G(d,p) | -0.4  | -0.0 | -0.0  | 0.0  | -0.5  |
| 2 | x, y, z       | 20.91 | B3LYP/6-31G(d,p) | 0.2   | -0.0 | -0.0  | 0.0  | 0.2   |

|   |               |       |                  |       |      |       |      |       |
|---|---------------|-------|------------------|-------|------|-------|------|-------|
| 2 | -x, y+1/2, -z | 14.55 | B3LYP/6-31G(d,p) | -0.2  | -0.0 | -0.2  | 0.0  | -0.4  |
| 2 | -x, y+1/2, -z | 19.79 | B3LYP/6-31G(d,p) | 0.4   | -0.0 | -0.0  | 0.0  | 0.4   |
| 2 | x, y, z       | 14.64 | B3LYP/6-31G(d,p) | 0.7   | -0.1 | -0.3  | 0.0  | 0.5   |
| 2 | x, y, z       | 25.18 | B3LYP/6-31G(d,p) | -0.1  | -0.0 | -0.0  | 0.0  | -0.1  |
| 2 | -x, y+1/2, -z | 26.30 | B3LYP/6-31G(d,p) | -0.0  | -0.0 | -0.0  | 0.0  | -0.1  |
| 2 | -x, y+1/2, -z | 23.30 | B3LYP/6-31G(d,p) | 0.0   | -0.0 | -0.0  | 0.0  | 0.0   |
| 2 | x, y, z       | 8.62  | B3LYP/6-31G(d,p) | -2.5  | -3.5 | -15.0 | 17.1 | -7.8  |
| 2 | -x, y+1/2, -z | 12.77 | B3LYP/6-31G(d,p) | 0.2   | -0.0 | -0.3  | 0.0  | -0.1  |
| 2 | x, y, z       | 14.64 | B3LYP/6-31G(d,p) | 0.6   | -0.0 | -0.2  | 0.0  | 0.4   |
| 2 | -x, y+1/2, -z | 7.94  | B3LYP/6-31G(d,p) | -12.3 | -5.2 | -32.8 | 22.8 | -31.4 |
| 2 | x, y, z       | 25.18 | B3LYP/6-31G(d,p) | -0.0  | -0.0 | -0.0  | 0.0  | -0.1  |
| 2 | -x, y+1/2, -z | 15.59 | B3LYP/6-31G(d,p) | 2.6   | -0.2 | -0.3  | 0.0  | 2.4   |
| 2 | x, y, z       | 23.66 | B3LYP/6-31G(d,p) | -0.1  | -0.0 | -0.0  | 0.0  | -0.1  |
| 2 | x, y, z       | 11.83 | B3LYP/6-31G(d,p) | 0.2   | -0.2 | -1.2  | 0.0  | -1.0  |
| 2 | -x, y+1/2, -z | 26.51 | B3LYP/6-31G(d,p) | 0.3   | -0.0 | -0.0  | 0.0  | 0.4   |
| 2 | -x, y+1/2, -z | 24.21 | B3LYP/6-31G(d,p) | -0.2  | -0.0 | -0.0  | 0.0  | -0.2  |
| 2 | -x, y+1/2, -z | 19.96 | B3LYP/6-31G(d,p) | -0.3  | -0.0 | -0.0  | 0.0  | -0.3  |
| 2 | -x, y+1/2, -z | 22.16 | B3LYP/6-31G(d,p) | 0.2   | -0.0 | -0.0  | 0.0  | 0.2   |
| 2 | -x, y+1/2, -z | 20.92 | B3LYP/6-31G(d,p) | -0.1  | -0.0 | -0.0  | 0.0  | -0.2  |
| 2 | -x, y+1/2, -z | 15.81 | B3LYP/6-31G(d,p) | -0.4  | -0.0 | -0.2  | 0.0  | -0.6  |
| 2 | -x, y+1/2, -z | 18.50 | B3LYP/6-31G(d,p) | 0.7   | -0.0 | -0.1  | 0.0  | 0.6   |
| 2 | -x, y+1/2, -z | 26.73 | B3LYP/6-31G(d,p) | 0.5   | -0.0 | -0.0  | 0.0  | 0.6   |
| 2 | -x, y+1/2, -z | 27.59 | B3LYP/6-31G(d,p) | -0.1  | -0.0 | -0.0  | 0.0  | -0.1  |
| 2 | -x, y+1/2, -z | 24.75 | B3LYP/6-31G(d,p) | -0.2  | -0.0 | -0.0  | 0.0  | -0.2  |

|   |               |       |                  |      |      |      |     |      |
|---|---------------|-------|------------------|------|------|------|-----|------|
| 2 | -x, y+1/2, -z | 27.68 | B3LYP/6-31G(d,p) | -0.0 | -0.0 | -0.0 | 0.0 | -0.0 |
| 2 | -x, y+1/2, -z | 24.85 | B3LYP/6-31G(d,p) | -0.0 | -0.0 | -0.0 | 0.0 | -0.1 |
| 2 | -x, y+1/2, -z | 30.04 | B3LYP/6-31G(d,p) | 0.3  | -0.0 | -0.0 | 0.0 | 0.3  |

**Table S9.** Lattice energy of GSF-nBuAc desolvated calculated for GSF molecule A at 20 Å cluster of molecules using B3LYP/6-31G(d,p) wavefunction; the total intermolecular interaction energy for a given molecule is the sum of the electrostatic, polarization, dispersion, and exchange-repulsion components with scale factors of 1.057, 0.740, 0.871, and 0.618, respectively.

| N | Symop   | R     | Electron Density | E_ele | E_pol | E_dis | E_rep | E_tot |
|---|---------|-------|------------------|-------|-------|-------|-------|-------|
| 1 | -       | 22.63 | B3LYP/6-31G(d,p) | -0.3  | -0.0  | -0.0  | 0.0   | -0.4  |
| 1 | -       | 21.19 | B3LYP/6-31G(d,p) | -0.3  | -0.0  | -0.0  | 0.0   | -0.3  |
| 1 | -       | 25.73 | B3LYP/6-31G(d,p) | 0.1   | -0.0  | -0.0  | 0.0   | 0.1   |
| 2 | x, y, z | 24.82 | B3LYP/6-31G(d,p) | 0.2   | -0.0  | -0.0  | 0.0   | 0.2   |
| 1 | -       | 22.70 | B3LYP/6-31G(d,p) | -0.3  | -0.0  | -0.0  | 0.0   | -0.3  |
| 1 | -       | 18.53 | B3LYP/6-31G(d,p) | -0.5  | -0.0  | -0.0  | 0.0   | -0.5  |
| 2 | x, y, z | 17.84 | B3LYP/6-31G(d,p) | 0.4   | -0.0  | -0.0  | 0.0   | 0.4   |
| 2 | x, y, z | 24.24 | B3LYP/6-31G(d,p) | 0.3   | -0.0  | -0.0  | 0.0   | 0.3   |
| 1 | -       | 26.75 | B3LYP/6-31G(d,p) | -0.2  | -0.0  | -0.0  | 0.0   | -0.2  |
| 1 | -       | 21.15 | B3LYP/6-31G(d,p) | 0.1   | -0.0  | -0.0  | 0.0   | 0.1   |
| 2 | x, y, z | 17.01 | B3LYP/6-31G(d,p) | 0.5   | -0.0  | -0.1  | 0.0   | 0.5   |
| 2 | x, y, z | 28.89 | B3LYP/6-31G(d,p) | -0.0  | -0.0  | -0.0  | 0.0   | -0.0  |
| 2 | x, y, z | 23.16 | B3LYP/6-31G(d,p) | -0.3  | -0.0  | -0.0  | 0.0   | -0.3  |
| 1 | -       | 22.64 | B3LYP/6-31G(d,p) | -0.3  | -0.0  | -0.0  | 0.0   | -0.4  |
| 2 | x, y, z | 25.83 | B3LYP/6-31G(d,p) | 0.3   | -0.0  | -0.0  | 0.0   | 0.3   |
| 1 | -       | 22.54 | B3LYP/6-31G(d,p) | -0.1  | -0.0  | -0.0  | 0.0   | -0.1  |



|   |         |       |                  |      |      |      |     |      |
|---|---------|-------|------------------|------|------|------|-----|------|
| 2 | x, y, z | 17.22 | B3LYP/6-31G(d,p) | 0.9  | -0.0 | -0.1 | 0.0 | 0.8  |
| 2 | x, y, z | 20.85 | B3LYP/6-31G(d,p) | 0.2  | -0.0 | -0.0 | 0.0 | 0.2  |
| 2 | x, y, z | 25.95 | B3LYP/6-31G(d,p) | 0.2  | -0.0 | -0.0 | 0.0 | 0.2  |
| 1 | -       | 18.99 | B3LYP/6-31G(d,p) | -0.4 | -0.0 | -0.0 | 0.0 | -0.5 |
| 1 | -       | 26.46 | B3LYP/6-31G(d,p) | 0.0  | -0.0 | -0.0 | 0.0 | 0.0  |
| 2 | x, y, z | 21.85 | B3LYP/6-31G(d,p) | 0.3  | -0.0 | -0.0 | 0.0 | 0.3  |
| 1 | -       | 17.24 | B3LYP/6-31G(d,p) | -0.5 | -0.0 | -0.1 | 0.0 | -0.6 |
| 2 | x, y, z | 20.00 | B3LYP/6-31G(d,p) | 0.4  | -0.0 | -0.0 | 0.0 | 0.4  |
| 2 | x, y, z | 23.60 | B3LYP/6-31G(d,p) | 0.0  | -0.0 | -0.0 | 0.0 | -0.0 |
| 1 | -       | 22.58 | B3LYP/6-31G(d,p) | 0.2  | -0.0 | -0.0 | 0.0 | 0.2  |
| 2 | x, y, z | 21.89 | B3LYP/6-31G(d,p) | -0.0 | -0.0 | -0.0 | 0.0 | -0.0 |
| 2 | x, y, z | 24.96 | B3LYP/6-31G(d,p) | 0.0  | -0.0 | -0.0 | 0.0 | 0.0  |
| 1 | -       | 17.06 | B3LYP/6-31G(d,p) | -0.2 | -0.0 | -0.1 | 0.0 | -0.3 |
| 1 | -       | 31.03 | B3LYP/6-31G(d,p) | 0.1  | -0.0 | -0.0 | 0.0 | 0.1  |
| 1 | -       | 27.19 | B3LYP/6-31G(d,p) | 0.3  | -0.0 | -0.0 | 0.0 | 0.3  |
| 1 | -       | 10.92 | B3LYP/6-31G(d,p) | -1.9 | -0.2 | -1.2 | 0.0 | -3.2 |
| 2 | x, y, z | 20.83 | B3LYP/6-31G(d,p) | 0.1  | -0.0 | -0.0 | 0.0 | 0.1  |
| 2 | x, y, z | 12.98 | B3LYP/6-31G(d,p) | 1.4  | -0.1 | -0.5 | 0.0 | 1.0  |
| 1 | -       | 14.94 | B3LYP/6-31G(d,p) | 0.6  | -0.1 | -0.2 | 0.0 | 0.4  |
| 2 | x, y, z | 11.80 | B3LYP/6-31G(d,p) | -0.5 | -0.1 | -0.9 | 0.0 | -1.4 |
| 1 | -       | 24.55 | B3LYP/6-31G(d,p) | 0.6  | -0.0 | -0.0 | 0.0 | 0.6  |
| 2 | x, y, z | 19.65 | B3LYP/6-31G(d,p) | -1.1 | -0.0 | -0.1 | 0.0 | -1.2 |
| 1 | -       | 22.29 | B3LYP/6-31G(d,p) | 0.2  | -0.0 | -0.0 | 0.0 | 0.1  |
| 1 | -       | 28.16 | B3LYP/6-31G(d,p) | -0.1 | -0.0 | -0.0 | 0.0 | -0.1 |

|   |         |       |                  |      |      |       |      |      |
|---|---------|-------|------------------|------|------|-------|------|------|
| 1 | -       | 14.70 | B3LYP/6-31G(d,p) | -1.3 | -0.0 | -0.3  | 0.0  | -1.7 |
| 2 | x, y, z | 14.56 | B3LYP/6-31G(d,p) | -0.8 | -0.1 | -0.3  | 0.0  | -1.2 |
| 1 | -       | 14.54 | B3LYP/6-31G(d,p) | -0.1 | -0.0 | -0.2  | 0.0  | -0.3 |
| 2 | x, y, z | 24.05 | B3LYP/6-31G(d,p) | 0.2  | -0.0 | -0.0  | 0.0  | 0.2  |
| 2 | x, y, z | 8.61  | B3LYP/6-31G(d,p) | -1.9 | -3.6 | -15.3 | 17.2 | -7.4 |
| 1 | -       | 21.97 | B3LYP/6-31G(d,p) | 0.2  | -0.0 | -0.0  | 0.0  | 0.1  |
| 2 | x, y, z | 14.57 | B3LYP/6-31G(d,p) | -1.3 | -0.3 | -0.8  | 0.0  | -2.3 |
| 2 | x, y, z | 29.14 | B3LYP/6-31G(d,p) | -0.2 | -0.0 | -0.0  | 0.0  | -0.2 |
| 2 | x, y, z | 25.03 | B3LYP/6-31G(d,p) | -0.7 | -0.0 | -0.0  | 0.0  | -0.7 |
| 1 | -       | 24.25 | B3LYP/6-31G(d,p) | -0.1 | -0.0 | -0.0  | 0.0  | -0.2 |
| 2 | x, y, z | 16.85 | B3LYP/6-31G(d,p) | 0.5  | -0.0 | -0.1  | 0.0  | 0.4  |
| 1 | -       | 21.78 | B3LYP/6-31G(d,p) | -0.3 | -0.0 | -0.0  | 0.0  | -0.3 |
| 2 | x, y, z | 24.66 | B3LYP/6-31G(d,p) | 0.3  | -0.0 | -0.0  | 0.0  | 0.3  |
| 2 | x, y, z | 17.70 | B3LYP/6-31G(d,p) | 0.5  | -0.0 | -0.1  | 0.0  | 0.5  |
| 1 | -       | 25.24 | B3LYP/6-31G(d,p) | -0.1 | -0.0 | -0.0  | 0.0  | -0.2 |
| 2 | x, y, z | 24.42 | B3LYP/6-31G(d,p) | 0.3  | -0.0 | -0.0  | 0.0  | 0.3  |
| 1 | -       | 18.90 | B3LYP/6-31G(d,p) | -0.4 | -0.0 | -0.0  | 0.0  | -0.5 |
| 2 | x, y, z | 21.76 | B3LYP/6-31G(d,p) | 0.0  | -0.0 | -0.0  | 0.0  | -0.0 |
| 1 | -       | 26.40 | B3LYP/6-31G(d,p) | 0.1  | -0.0 | -0.0  | 0.0  | 0.1  |
| 1 | -       | 17.14 | B3LYP/6-31G(d,p) | -0.5 | -0.0 | -0.1  | 0.0  | -0.6 |
| 2 | x, y, z | 21.69 | B3LYP/6-31G(d,p) | 0.3  | -0.0 | -0.0  | 0.0  | 0.3  |
| 1 | -       | 22.50 | B3LYP/6-31G(d,p) | 0.2  | -0.0 | -0.0  | 0.0  | 0.2  |
| 2 | x, y, z | 23.45 | B3LYP/6-31G(d,p) | 0.1  | -0.0 | -0.0  | 0.0  | 0.0  |
| 1 | -       | 27.39 | B3LYP/6-31G(d,p) | -0.1 | -0.0 | -0.0  | 0.0  | -0.1 |

|   |         |       |                  |       |      |       |      |       |
|---|---------|-------|------------------|-------|------|-------|------|-------|
| 2 | x, y, z | 28.89 | B3LYP/6-31G(d,p) | -0.2  | -0.0 | -0.0  | 0.0  | -0.2  |
| 1 | -       | 25.76 | B3LYP/6-31G(d,p) | 0.5   | -0.0 | -0.0  | 0.0  | 0.5   |
| 1 | -       | 14.68 | B3LYP/6-31G(d,p) | 1.4   | -0.2 | -0.4  | 0.0  | 1.0   |
| 2 | x, y, z | 25.01 | B3LYP/6-31G(d,p) | -0.5  | -0.0 | -0.0  | 0.0  | -0.5  |
| 2 | x, y, z | 21.73 | B3LYP/6-31G(d,p) | -0.0  | -0.0 | -0.0  | 0.0  | -0.1  |
| 1 | -       | 6.58  | B3LYP/6-31G(d,p) | -6.8  | -1.0 | -35.7 | 19.2 | -27.1 |
| 2 | x, y, z | 12.92 | B3LYP/6-31G(d,p) | 1.0   | -0.1 | -0.6  | 0.0  | 0.5   |
| 1 | -       | 12.12 | B3LYP/6-31G(d,p) | -4.6  | -2.2 | -5.6  | 0.0  | -11.4 |
| 2 | x, y, z | 11.73 | B3LYP/6-31G(d,p) | 0.5   | -0.1 | -0.7  | 0.0  | -0.2  |
| 1 | -       | 22.95 | B3LYP/6-31G(d,p) | 1.0   | -0.0 | -0.0  | 0.0  | 1.1   |
| 2 | x, y, z | 19.60 | B3LYP/6-31G(d,p) | -0.8  | -0.0 | -0.0  | 0.0  | -0.9  |
| 2 | x, y, z | 30.15 | B3LYP/6-31G(d,p) | -0.4  | -0.0 | -0.0  | 0.0  | -0.4  |
| 1 | -       | 18.67 | B3LYP/6-31G(d,p) | 1.6   | -0.1 | -0.1  | 0.0  | 1.5   |
| 1 | -       | 8.24  | B3LYP/6-31G(d,p) | -15.6 | -4.5 | -40.0 | 25.1 | -39.2 |
| 2 | x, y, z | 23.03 | B3LYP/6-31G(d,p) | -0.2  | -0.0 | -0.0  | 0.0  | -0.2  |
| 2 | x, y, z | 11.75 | B3LYP/6-31G(d,p) | -19.5 | -7.5 | -15.6 | 17.3 | -29.1 |
| 1 | -       | 7.93  | B3LYP/6-31G(d,p) | -15.6 | -5.0 | -28.6 | 19.0 | -33.4 |
| 1 | -       | 18.27 | B3LYP/6-31G(d,p) | 0.2   | -0.0 | -0.1  | 0.0  | 0.1   |
| 1 | -       | 29.68 | B3LYP/6-31G(d,p) | 0.2   | -0.0 | -0.0  | 0.0  | 0.2   |
| 2 | x, y, z | 23.49 | B3LYP/6-31G(d,p) | -0.9  | -0.0 | -0.0  | 0.0  | -1.0  |
| 1 | -       | 19.17 | B3LYP/6-31G(d,p) | -0.0  | -0.0 | -0.0  | 0.0  | -0.1  |
| 1 | -       | 15.93 | B3LYP/6-31G(d,p) | -0.5  | -0.0 | -0.1  | 0.0  | -0.6  |
| 1 | -       | 20.40 | B3LYP/6-31G(d,p) | -0.4  | -0.0 | -0.0  | 0.0  | -0.4  |
| 2 | x, y, z | 24.88 | B3LYP/6-31G(d,p) | -0.0  | -0.0 | -0.0  | 0.0  | -0.0  |

|   |         |       |                  |       |      |       |      |       |
|---|---------|-------|------------------|-------|------|-------|------|-------|
| 1 | -       | 27.81 | B3LYP/6-31G(d,p) | -0.1  | -0.0 | -0.0  | 0.0  | -0.1  |
| 2 | x, y, z | 25.83 | B3LYP/6-31G(d,p) | 0.2   | -0.0 | -0.0  | 0.0  | 0.2   |
| 1 | -       | 22.41 | B3LYP/6-31G(d,p) | -0.3  | -0.0 | -0.0  | 0.0  | -0.3  |
| 1 | -       | 20.94 | B3LYP/6-31G(d,p) | -0.3  | -0.0 | -0.0  | 0.0  | -0.3  |
| 1 | -       | 25.50 | B3LYP/6-31G(d,p) | 0.1   | -0.0 | -0.0  | 0.0  | 0.1   |
| 1 | -       | 27.14 | B3LYP/6-31G(d,p) | 0.3   | -0.0 | -0.0  | 0.0  | 0.3   |
| 1 | -       | 16.97 | B3LYP/6-31G(d,p) | -0.0  | -0.0 | -0.1  | 0.0  | -0.2  |
| 1 | -       | 10.75 | B3LYP/6-31G(d,p) | -2.0  | -0.1 | -1.4  | 0.0  | -3.4  |
| 1 | -       | 14.80 | B3LYP/6-31G(d,p) | 0.7   | -0.1 | -0.3  | 0.0  | 0.5   |
| 1 | -       | 24.46 | B3LYP/6-31G(d,p) | 0.6   | -0.0 | -0.0  | 0.0  | 0.6   |
| 1 | -       | 18.68 | B3LYP/6-31G(d,p) | 1.7   | -0.1 | -0.1  | 0.0  | 1.6   |
| 1 | -       | 30.09 | B3LYP/6-31G(d,p) | 0.4   | -0.0 | -0.0  | 0.0  | 0.4   |
| 1 | -       | 30.10 | B3LYP/6-31G(d,p) | 0.4   | -0.0 | -0.0  | 0.0  | 0.4   |
| 1 | -       | 8.24  | B3LYP/6-31G(d,p) | -16.1 | -4.5 | -40.6 | 26.2 | -39.6 |
| 1 | -       | 7.92  | B3LYP/6-31G(d,p) | -16.9 | -5.0 | -29.7 | 21.2 | -34.3 |
| 1 | -       | 18.26 | B3LYP/6-31G(d,p) | 0.3   | -0.0 | -0.1  | 0.0  | 0.2   |
| 1 | -       | 29.67 | B3LYP/6-31G(d,p) | 0.2   | -0.0 | -0.0  | 0.0  | 0.2   |
| 1 | -       | 27.51 | B3LYP/6-31G(d,p) | 0.2   | -0.0 | -0.0  | 0.0  | 0.2   |
| 1 | -       | 26.17 | B3LYP/6-31G(d,p) | 0.4   | -0.0 | -0.0  | 0.0  | 0.4   |
| 1 | -       | 17.18 | B3LYP/6-31G(d,p) | 0.3   | -0.0 | -0.1  | 0.0  | 0.3   |
| 1 | -       | 13.46 | B3LYP/6-31G(d,p) | 0.1   | -0.0 | -0.3  | 0.0  | -0.2  |
| 1 | -       | 18.53 | B3LYP/6-31G(d,p) | -0.4  | -0.0 | -0.1  | 0.0  | -0.5  |
| 1 | -       | 27.95 | B3LYP/6-31G(d,p) | -0.0  | -0.0 | -0.0  | 0.0  | -0.0  |
| 1 | -       | 23.97 | B3LYP/6-31G(d,p) | -0.0  | -0.0 | -0.0  | 0.0  | -0.1  |

|   |   |       |                  |      |      |      |     |      |
|---|---|-------|------------------|------|------|------|-----|------|
| 1 | - | 25.07 | B3LYP/6-31G(d,p) | -0.1 | -0.0 | -0.0 | 0.0 | -0.2 |
| 1 | - | 22.56 | B3LYP/6-31G(d,p) | -0.2 | -0.0 | -0.0 | 0.0 | -0.3 |
| 1 | - | 30.94 | B3LYP/6-31G(d,p) | 0.1  | -0.0 | -0.0 | 0.0 | 0.1  |
| 1 | - | 18.34 | B3LYP/6-31G(d,p) | -0.5 | -0.0 | -0.0 | 0.0 | -0.6 |
| 1 | - | 20.96 | B3LYP/6-31G(d,p) | 0.1  | -0.0 | -0.0 | 0.0 | 0.1  |
| 1 | - | 22.30 | B3LYP/6-31G(d,p) | 0.2  | -0.0 | -0.0 | 0.0 | 0.2  |
| 1 | - | 14.70 | B3LYP/6-31G(d,p) | -1.2 | -0.0 | -0.3 | 0.0 | -1.5 |
| 1 | - | 14.52 | B3LYP/6-31G(d,p) | -0.3 | -0.0 | -0.2 | 0.0 | -0.4 |
| 1 | - | 21.94 | B3LYP/6-31G(d,p) | 0.1  | -0.0 | -0.0 | 0.0 | 0.1  |
| 1 | - | 27.58 | B3LYP/6-31G(d,p) | 0.2  | -0.0 | -0.0 | 0.0 | 0.2  |
| 1 | - | 19.26 | B3LYP/6-31G(d,p) | -0.0 | -0.0 | -0.0 | 0.0 | -0.0 |
| 1 | - | 16.03 | B3LYP/6-31G(d,p) | -0.5 | -0.0 | -0.1 | 0.0 | -0.6 |
| 1 | - | 20.47 | B3LYP/6-31G(d,p) | -0.4 | -0.0 | -0.0 | 0.0 | -0.4 |
| 1 | - | 24.04 | B3LYP/6-31G(d,p) | -0.0 | -0.0 | -0.0 | 0.0 | -0.1 |
| 1 | - | 25.13 | B3LYP/6-31G(d,p) | -0.1 | -0.0 | -0.0 | 0.0 | -0.2 |
| 1 | - | 26.55 | B3LYP/6-31G(d,p) | -0.2 | -0.0 | -0.0 | 0.0 | -0.2 |
| 1 | - | 28.18 | B3LYP/6-31G(d,p) | -0.0 | -0.0 | -0.0 | 0.0 | -0.0 |
| 1 | - | 22.64 | B3LYP/6-31G(d,p) | -0.3 | -0.0 | -0.0 | 0.0 | -0.3 |
| 1 | - | 22.52 | B3LYP/6-31G(d,p) | -0.2 | -0.0 | -0.0 | 0.0 | -0.2 |
| 1 | - | 24.39 | B3LYP/6-31G(d,p) | -0.1 | -0.0 | -0.0 | 0.0 | -0.1 |
| 1 | - | 21.93 | B3LYP/6-31G(d,p) | -0.3 | -0.0 | -0.0 | 0.0 | -0.3 |
| 1 | - | 25.35 | B3LYP/6-31G(d,p) | -0.2 | -0.0 | -0.0 | 0.0 | -0.2 |

**Table S10.** Lattice energy of GSF-nBuAc desolvated calculated for GSF molecule B at 20 Å cluster of molecules using B3LYP/6-31G(d,p) wavefunction; the total intermolecular interaction energy for a given molecule is the sum of the electrostatic, polarization, dispersion, and exchange-repulsion components with scale factors of 1.057, 0.740, 0.871, and 0.618, respectively.

| N | Symop   | R     | Electron Density | E_ele | E_pol | E_dis | E_rep | E_tot |
|---|---------|-------|------------------|-------|-------|-------|-------|-------|
| 1 | -       | 22.63 | B3LYP/6-31G(d,p) | -0.3  | -0.0  | -0.0  | 0.0   | -0.4  |
| 1 | -       | 21.19 | B3LYP/6-31G(d,p) | -0.3  | -0.0  | -0.0  | 0.0   | -0.3  |
| 1 | -       | 25.73 | B3LYP/6-31G(d,p) | 0.1   | -0.0  | -0.0  | 0.0   | 0.1   |
| 0 | x, y, z | 24.82 | B3LYP/6-31G(d,p) | 0.2   | -0.0  | -0.0  | 0.0   | 0.2   |
| 1 | -       | 22.70 | B3LYP/6-31G(d,p) | -0.3  | -0.0  | -0.0  | 0.0   | -0.3  |
| 1 | -       | 18.53 | B3LYP/6-31G(d,p) | -0.5  | -0.0  | -0.0  | 0.0   | -0.5  |
| 0 | x, y, z | 17.84 | B3LYP/6-31G(d,p) | 0.4   | -0.0  | -0.0  | 0.0   | 0.4   |
| 0 | x, y, z | 24.24 | B3LYP/6-31G(d,p) | 0.3   | -0.0  | -0.0  | 0.0   | 0.3   |
| 1 | -       | 26.75 | B3LYP/6-31G(d,p) | -0.2  | -0.0  | -0.0  | 0.0   | -0.2  |
| 1 | -       | 21.15 | B3LYP/6-31G(d,p) | 0.1   | -0.0  | -0.0  | 0.0   | 0.1   |
| 0 | x, y, z | 17.01 | B3LYP/6-31G(d,p) | 0.5   | -0.0  | -0.1  | 0.0   | 0.5   |
| 0 | x, y, z | 28.89 | B3LYP/6-31G(d,p) | -0.0  | -0.0  | -0.0  | 0.0   | -0.0  |
| 0 | x, y, z | 23.16 | B3LYP/6-31G(d,p) | -0.3  | -0.0  | -0.0  | 0.0   | -0.3  |
| 1 | -       | 22.64 | B3LYP/6-31G(d,p) | -0.3  | -0.0  | -0.0  | 0.0   | -0.4  |
| 0 | x, y, z | 25.83 | B3LYP/6-31G(d,p) | 0.3   | -0.0  | -0.0  | 0.0   | 0.3   |
| 1 | -       | 22.54 | B3LYP/6-31G(d,p) | -0.1  | -0.0  | -0.0  | 0.0   | -0.1  |
| 0 | x, y, z | 17.22 | B3LYP/6-31G(d,p) | 0.9   | -0.0  | -0.1  | 0.0   | 0.8   |
| 0 | x, y, z | 20.85 | B3LYP/6-31G(d,p) | 0.2   | -0.0  | -0.0  | 0.0   | 0.2   |
| 0 | x, y, z | 25.95 | B3LYP/6-31G(d,p) | 0.2   | -0.0  | -0.0  | 0.0   | 0.2   |

|   |         |       |                  |      |      |      |     |      |
|---|---------|-------|------------------|------|------|------|-----|------|
| 1 | -       | 18.99 | B3LYP/6-31G(d,p) | -0.4 | -0.0 | -0.0 | 0.0 | -0.5 |
| 1 | -       | 26.46 | B3LYP/6-31G(d,p) | 0.0  | -0.0 | -0.0 | 0.0 | 0.0  |
| 0 | x, y, z | 21.85 | B3LYP/6-31G(d,p) | 0.3  | -0.0 | -0.0 | 0.0 | 0.3  |
| 1 | -       | 17.24 | B3LYP/6-31G(d,p) | -0.5 | -0.0 | -0.1 | 0.0 | -0.6 |
| 0 | x, y, z | 20.00 | B3LYP/6-31G(d,p) | 0.4  | -0.0 | -0.0 | 0.0 | 0.4  |
| 0 | x, y, z | 23.60 | B3LYP/6-31G(d,p) | 0.0  | -0.0 | -0.0 | 0.0 | -0.0 |
| 1 | -       | 22.58 | B3LYP/6-31G(d,p) | 0.2  | -0.0 | -0.0 | 0.0 | 0.2  |
| 0 | x, y, z | 21.89 | B3LYP/6-31G(d,p) | -0.0 | -0.0 | -0.0 | 0.0 | -0.0 |
| 0 | x, y, z | 24.96 | B3LYP/6-31G(d,p) | 0.0  | -0.0 | -0.0 | 0.0 | 0.0  |
| 1 | -       | 17.06 | B3LYP/6-31G(d,p) | -0.2 | -0.0 | -0.1 | 0.0 | -0.3 |
| 1 | -       | 31.03 | B3LYP/6-31G(d,p) | 0.1  | -0.0 | -0.0 | 0.0 | 0.1  |
| 1 | -       | 27.19 | B3LYP/6-31G(d,p) | 0.3  | -0.0 | -0.0 | 0.0 | 0.3  |
| 1 | -       | 10.92 | B3LYP/6-31G(d,p) | -1.9 | -0.2 | -1.2 | 0.0 | -3.2 |
| 0 | x, y, z | 20.83 | B3LYP/6-31G(d,p) | 0.1  | -0.0 | -0.0 | 0.0 | 0.1  |
| 0 | x, y, z | 12.98 | B3LYP/6-31G(d,p) | 1.4  | -0.1 | -0.5 | 0.0 | 1.0  |
| 1 | -       | 14.94 | B3LYP/6-31G(d,p) | 0.6  | -0.1 | -0.2 | 0.0 | 0.4  |
| 0 | x, y, z | 11.80 | B3LYP/6-31G(d,p) | -0.5 | -0.1 | -0.9 | 0.0 | -1.4 |
| 1 | -       | 24.55 | B3LYP/6-31G(d,p) | 0.6  | -0.0 | -0.0 | 0.0 | 0.6  |
| 0 | x, y, z | 19.65 | B3LYP/6-31G(d,p) | -1.1 | -0.0 | -0.1 | 0.0 | -1.2 |
| 1 | -       | 22.29 | B3LYP/6-31G(d,p) | 0.2  | -0.0 | -0.0 | 0.0 | 0.1  |
| 1 | -       | 28.16 | B3LYP/6-31G(d,p) | -0.1 | -0.0 | -0.0 | 0.0 | -0.1 |
| 1 | -       | 14.70 | B3LYP/6-31G(d,p) | -1.3 | -0.0 | -0.3 | 0.0 | -1.7 |
| 0 | x, y, z | 14.56 | B3LYP/6-31G(d,p) | -0.8 | -0.1 | -0.3 | 0.0 | -1.2 |
| 1 | -       | 14.54 | B3LYP/6-31G(d,p) | -0.1 | -0.0 | -0.2 | 0.0 | -0.3 |

|   |         |       |                  |      |      |       |      |      |
|---|---------|-------|------------------|------|------|-------|------|------|
| 0 | x, y, z | 24.05 | B3LYP/6-31G(d,p) | 0.2  | -0.0 | -0.0  | 0.0  | 0.2  |
| 0 | x, y, z | 8.61  | B3LYP/6-31G(d,p) | -1.9 | -3.6 | -15.3 | 17.2 | -7.4 |
| 1 | -       | 21.97 | B3LYP/6-31G(d,p) | 0.2  | -0.0 | -0.0  | 0.0  | 0.1  |
| 0 | x, y, z | 14.57 | B3LYP/6-31G(d,p) | -1.3 | -0.3 | -0.8  | 0.0  | -2.3 |
| 0 | x, y, z | 29.14 | B3LYP/6-31G(d,p) | -0.2 | -0.0 | -0.0  | 0.0  | -0.2 |
| 0 | x, y, z | 25.03 | B3LYP/6-31G(d,p) | -0.7 | -0.0 | -0.0  | 0.0  | -0.7 |
| 1 | -       | 24.25 | B3LYP/6-31G(d,p) | -0.1 | -0.0 | -0.0  | 0.0  | -0.2 |
| 0 | x, y, z | 16.85 | B3LYP/6-31G(d,p) | 0.5  | -0.0 | -0.1  | 0.0  | 0.4  |
| 1 | -       | 21.78 | B3LYP/6-31G(d,p) | -0.3 | -0.0 | -0.0  | 0.0  | -0.3 |
| 0 | x, y, z | 24.66 | B3LYP/6-31G(d,p) | 0.3  | -0.0 | -0.0  | 0.0  | 0.3  |
| 0 | x, y, z | 17.70 | B3LYP/6-31G(d,p) | 0.5  | -0.0 | -0.1  | 0.0  | 0.5  |
| 1 | -       | 25.24 | B3LYP/6-31G(d,p) | -0.1 | -0.0 | -0.0  | 0.0  | -0.2 |
| 0 | x, y, z | 24.42 | B3LYP/6-31G(d,p) | 0.3  | -0.0 | -0.0  | 0.0  | 0.3  |
| 1 | -       | 18.90 | B3LYP/6-31G(d,p) | -0.4 | -0.0 | -0.0  | 0.0  | -0.5 |
| 0 | x, y, z | 21.76 | B3LYP/6-31G(d,p) | 0.0  | -0.0 | -0.0  | 0.0  | -0.0 |
| 1 | -       | 26.40 | B3LYP/6-31G(d,p) | 0.1  | -0.0 | -0.0  | 0.0  | 0.1  |
| 1 | -       | 17.14 | B3LYP/6-31G(d,p) | -0.5 | -0.0 | -0.1  | 0.0  | -0.6 |
| 0 | x, y, z | 21.69 | B3LYP/6-31G(d,p) | 0.3  | -0.0 | -0.0  | 0.0  | 0.3  |
| 1 | -       | 22.50 | B3LYP/6-31G(d,p) | 0.2  | -0.0 | -0.0  | 0.0  | 0.2  |
| 0 | x, y, z | 23.45 | B3LYP/6-31G(d,p) | 0.1  | -0.0 | -0.0  | 0.0  | 0.0  |
| 1 | -       | 27.39 | B3LYP/6-31G(d,p) | -0.1 | -0.0 | -0.0  | 0.0  | -0.1 |
| 0 | x, y, z | 28.89 | B3LYP/6-31G(d,p) | -0.2 | -0.0 | -0.0  | 0.0  | -0.2 |
| 1 | -       | 25.76 | B3LYP/6-31G(d,p) | 0.5  | -0.0 | -0.0  | 0.0  | 0.5  |
| 1 | -       | 14.68 | B3LYP/6-31G(d,p) | 1.4  | -0.2 | -0.4  | 0.0  | 1.0  |



|   |         |       |                  |       |      |       |      |       |
|---|---------|-------|------------------|-------|------|-------|------|-------|
| 0 | x, y, z | 25.01 | B3LYP/6-31G(d,p) | -0.5  | -0.0 | -0.0  | 0.0  | -0.5  |
| 0 | x, y, z | 21.73 | B3LYP/6-31G(d,p) | -0.0  | -0.0 | -0.0  | 0.0  | -0.1  |
| 1 | -       | 6.58  | B3LYP/6-31G(d,p) | -6.8  | -1.0 | -35.7 | 19.2 | -27.1 |
| 0 | x, y, z | 12.92 | B3LYP/6-31G(d,p) | 1.0   | -0.1 | -0.6  | 0.0  | 0.5   |
| 1 | -       | 12.12 | B3LYP/6-31G(d,p) | -4.6  | -2.2 | -5.6  | 0.0  | -11.4 |
| 0 | x, y, z | 11.73 | B3LYP/6-31G(d,p) | 0.5   | -0.1 | -0.7  | 0.0  | -0.2  |
| 1 | -       | 22.95 | B3LYP/6-31G(d,p) | 1.0   | -0.0 | -0.0  | 0.0  | 1.1   |
| 0 | x, y, z | 19.60 | B3LYP/6-31G(d,p) | -0.8  | -0.0 | -0.0  | 0.0  | -0.9  |
| 0 | x, y, z | 30.15 | B3LYP/6-31G(d,p) | -0.4  | -0.0 | -0.0  | 0.0  | -0.4  |
| 1 | -       | 18.67 | B3LYP/6-31G(d,p) | 1.6   | -0.1 | -0.1  | 0.0  | 1.5   |
| 1 | -       | 8.24  | B3LYP/6-31G(d,p) | -15.6 | -4.5 | -40.0 | 25.1 | -39.2 |
| 0 | x, y, z | 23.03 | B3LYP/6-31G(d,p) | -0.2  | -0.0 | -0.0  | 0.0  | -0.2  |
| 0 | x, y, z | 11.75 | B3LYP/6-31G(d,p) | -19.5 | -7.5 | -15.6 | 17.3 | -29.1 |
| 1 | -       | 7.93  | B3LYP/6-31G(d,p) | -15.6 | -5.0 | -28.6 | 19.0 | -33.4 |
| 1 | -       | 18.27 | B3LYP/6-31G(d,p) | 0.2   | -0.0 | -0.1  | 0.0  | 0.1   |
| 1 | -       | 29.68 | B3LYP/6-31G(d,p) | 0.2   | -0.0 | -0.0  | 0.0  | 0.2   |
| 0 | x, y, z | 23.49 | B3LYP/6-31G(d,p) | -0.9  | -0.0 | -0.0  | 0.0  | -1.0  |
| 1 | -       | 19.17 | B3LYP/6-31G(d,p) | -0.0  | -0.0 | -0.0  | 0.0  | -0.1  |
| 1 | -       | 15.93 | B3LYP/6-31G(d,p) | -0.5  | -0.0 | -0.1  | 0.0  | -0.6  |
| 1 | -       | 20.40 | B3LYP/6-31G(d,p) | -0.4  | -0.0 | -0.0  | 0.0  | -0.4  |
| 0 | x, y, z | 24.88 | B3LYP/6-31G(d,p) | -0.0  | -0.0 | -0.0  | 0.0  | -0.0  |
| 1 | -       | 27.81 | B3LYP/6-31G(d,p) | -0.1  | -0.0 | -0.0  | 0.0  | -0.1  |
| 0 | x, y, z | 25.83 | B3LYP/6-31G(d,p) | 0.2   | -0.0 | -0.0  | 0.0  | 0.2   |
| 1 | -       | 22.41 | B3LYP/6-31G(d,p) | -0.3  | -0.0 | -0.0  | 0.0  | -0.3  |

|   |   |       |                  |       |      |       |      |       |
|---|---|-------|------------------|-------|------|-------|------|-------|
| 1 | - | 20.94 | B3LYP/6-31G(d,p) | -0.3  | -0.0 | -0.0  | 0.0  | -0.3  |
| 1 | - | 25.50 | B3LYP/6-31G(d,p) | 0.1   | -0.0 | -0.0  | 0.0  | 0.1   |
| 1 | - | 27.14 | B3LYP/6-31G(d,p) | 0.3   | -0.0 | -0.0  | 0.0  | 0.3   |
| 1 | - | 16.97 | B3LYP/6-31G(d,p) | -0.0  | -0.0 | -0.1  | 0.0  | -0.2  |
| 1 | - | 10.75 | B3LYP/6-31G(d,p) | -2.0  | -0.1 | -1.4  | 0.0  | -3.4  |
| 1 | - | 14.80 | B3LYP/6-31G(d,p) | 0.7   | -0.1 | -0.3  | 0.0  | 0.5   |
| 1 | - | 24.46 | B3LYP/6-31G(d,p) | 0.6   | -0.0 | -0.0  | 0.0  | 0.6   |
| 1 | - | 18.68 | B3LYP/6-31G(d,p) | 1.7   | -0.1 | -0.1  | 0.0  | 1.6   |
| 1 | - | 30.09 | B3LYP/6-31G(d,p) | 0.4   | -0.0 | -0.0  | 0.0  | 0.4   |
| 1 | - | 30.10 | B3LYP/6-31G(d,p) | 0.4   | -0.0 | -0.0  | 0.0  | 0.4   |
| 1 | - | 8.24  | B3LYP/6-31G(d,p) | -16.1 | -4.5 | -40.6 | 26.2 | -39.6 |
| 1 | - | 7.92  | B3LYP/6-31G(d,p) | -16.9 | -5.0 | -29.7 | 21.2 | -34.3 |
| 1 | - | 18.26 | B3LYP/6-31G(d,p) | 0.3   | -0.0 | -0.1  | 0.0  | 0.2   |
| 1 | - | 29.67 | B3LYP/6-31G(d,p) | 0.2   | -0.0 | -0.0  | 0.0  | 0.2   |
| 1 | - | 27.51 | B3LYP/6-31G(d,p) | 0.2   | -0.0 | -0.0  | 0.0  | 0.2   |
| 1 | - | 26.17 | B3LYP/6-31G(d,p) | 0.4   | -0.0 | -0.0  | 0.0  | 0.4   |
| 1 | - | 17.18 | B3LYP/6-31G(d,p) | 0.3   | -0.0 | -0.1  | 0.0  | 0.3   |
| 1 | - | 13.46 | B3LYP/6-31G(d,p) | 0.1   | -0.0 | -0.3  | 0.0  | -0.2  |
| 1 | - | 18.53 | B3LYP/6-31G(d,p) | -0.4  | -0.0 | -0.1  | 0.0  | -0.5  |
| 1 | - | 27.95 | B3LYP/6-31G(d,p) | -0.0  | -0.0 | -0.0  | 0.0  | -0.0  |
| 1 | - | 23.97 | B3LYP/6-31G(d,p) | -0.0  | -0.0 | -0.0  | 0.0  | -0.1  |
| 1 | - | 25.07 | B3LYP/6-31G(d,p) | -0.1  | -0.0 | -0.0  | 0.0  | -0.2  |
| 1 | - | 22.56 | B3LYP/6-31G(d,p) | -0.2  | -0.0 | -0.0  | 0.0  | -0.3  |
| 1 | - | 30.94 | B3LYP/6-31G(d,p) | 0.1   | -0.0 | -0.0  | 0.0  | 0.1   |

|   |         |       |                  |      |      |      |     |      |
|---|---------|-------|------------------|------|------|------|-----|------|
| 1 | -       | 18.34 | B3LYP/6-31G(d,p) | -0.5 | -0.0 | -0.0 | 0.0 | -0.6 |
| 1 | -       | 20.96 | B3LYP/6-31G(d,p) | 0.1  | -0.0 | -0.0 | 0.0 | 0.1  |
| 1 | -       | 22.30 | B3LYP/6-31G(d,p) | 0.2  | -0.0 | -0.0 | 0.0 | 0.2  |
| 1 | -       | 14.70 | B3LYP/6-31G(d,p) | -1.2 | -0.0 | -0.3 | 0.0 | -1.5 |
| 1 | -       | 14.52 | B3LYP/6-31G(d,p) | -0.3 | -0.0 | -0.2 | 0.0 | -0.4 |
| 1 | -       | 21.94 | B3LYP/6-31G(d,p) | 0.1  | -0.0 | -0.0 | 0.0 | 0.1  |
| 1 | -       | 27.58 | B3LYP/6-31G(d,p) | 0.2  | -0.0 | -0.0 | 0.0 | 0.2  |
| 1 | -       | 19.26 | B3LYP/6-31G(d,p) | -0.0 | -0.0 | -0.0 | 0.0 | -0.0 |
| 1 | -       | 16.03 | B3LYP/6-31G(d,p) | -0.5 | -0.0 | -0.1 | 0.0 | -0.6 |
| 1 | -       | 20.47 | B3LYP/6-31G(d,p) | -0.4 | -0.0 | -0.0 | 0.0 | -0.4 |
| 1 | -       | 24.04 | B3LYP/6-31G(d,p) | -0.0 | -0.0 | -0.0 | 0.0 | -0.1 |
| 1 | -       | 25.13 | B3LYP/6-31G(d,p) | -0.1 | -0.0 | -0.0 | 0.0 | -0.2 |
| 1 | -       | 26.55 | B3LYP/6-31G(d,p) | -0.2 | -0.0 | -0.0 | 0.0 | -0.2 |
| 1 | -       | 28.18 | B3LYP/6-31G(d,p) | -0.0 | -0.0 | -0.0 | 0.0 | -0.0 |
| 1 | -       | 22.64 | B3LYP/6-31G(d,p) | -0.3 | -0.0 | -0.0 | 0.0 | -0.3 |
| 1 | -       | 22.52 | B3LYP/6-31G(d,p) | -0.2 | -0.0 | -0.0 | 0.0 | -0.2 |
| 1 | -       | 24.39 | B3LYP/6-31G(d,p) | -0.1 | -0.0 | -0.0 | 0.0 | -0.1 |
| 1 | -       | 21.93 | B3LYP/6-31G(d,p) | -0.3 | -0.0 | -0.0 | 0.0 | -0.3 |
| 1 | -       | 25.35 | B3LYP/6-31G(d,p) | -0.2 | -0.0 | -0.0 | 0.0 | -0.2 |
| 2 | x, y, z | 21.85 | B3LYP/6-31G(d,p) | 0.2  | -0.0 | -0.0 | 0.0 | 0.2  |
| 2 | x, y, z | 25.95 | B3LYP/6-31G(d,p) | 0.1  | -0.0 | -0.0 | 0.0 | 0.1  |
| 2 | x, y, z | 23.60 | B3LYP/6-31G(d,p) | 0.1  | -0.0 | -0.0 | 0.0 | 0.1  |
| 2 | x, y, z | 17.84 | B3LYP/6-31G(d,p) | 0.3  | -0.0 | -0.1 | 0.0 | 0.3  |
| 2 | x, y, z | 24.96 | B3LYP/6-31G(d,p) | -0.0 | -0.0 | -0.0 | 0.0 | -0.0 |

|   |         |       |                  |      |      |       |      |      |
|---|---------|-------|------------------|------|------|-------|------|------|
| 2 | x, y, z | 24.82 | B3LYP/6-31G(d,p) | 0.2  | -0.0 | -0.0  | 0.0  | 0.2  |
| 2 | x, y, z | 17.01 | B3LYP/6-31G(d,p) | 0.3  | -0.0 | -0.1  | 0.0  | 0.3  |
| 2 | x, y, z | 24.24 | B3LYP/6-31G(d,p) | 0.2  | -0.0 | -0.0  | 0.0  | 0.2  |
| 2 | x, y, z | 23.16 | B3LYP/6-31G(d,p) | -0.2 | -0.0 | -0.0  | 0.0  | -0.2 |
| 2 | x, y, z | 20.83 | B3LYP/6-31G(d,p) | 0.2  | -0.0 | -0.0  | 0.0  | 0.2  |
| 2 | x, y, z | 17.22 | B3LYP/6-31G(d,p) | 0.7  | -0.0 | -0.1  | 0.0  | 0.7  |
| 2 | x, y, z | 25.83 | B3LYP/6-31G(d,p) | 0.2  | -0.0 | -0.0  | 0.0  | 0.2  |
| 2 | x, y, z | 20.85 | B3LYP/6-31G(d,p) | 0.0  | -0.0 | -0.0  | 0.0  | -0.0 |
| 2 | x, y, z | 24.66 | B3LYP/6-31G(d,p) | 0.2  | -0.0 | -0.0  | 0.0  | 0.2  |
| 2 | x, y, z | 24.42 | B3LYP/6-31G(d,p) | 0.2  | -0.0 | -0.0  | 0.0  | 0.2  |
| 2 | x, y, z | 20.00 | B3LYP/6-31G(d,p) | 0.3  | -0.0 | -0.0  | 0.0  | 0.3  |
| 2 | x, y, z | 21.89 | B3LYP/6-31G(d,p) | 0.0  | -0.0 | -0.0  | 0.0  | 0.0  |
| 2 | x, y, z | 21.76 | B3LYP/6-31G(d,p) | -0.0 | -0.0 | -0.0  | 0.0  | -0.1 |
| 2 | x, y, z | 12.98 | B3LYP/6-31G(d,p) | 0.4  | -0.1 | -0.6  | 0.0  | -0.1 |
| 2 | x, y, z | 11.80 | B3LYP/6-31G(d,p) | 0.4  | -0.0 | -0.7  | 0.0  | -0.2 |
| 2 | x, y, z | 19.65 | B3LYP/6-31G(d,p) | -0.6 | -0.0 | -0.0  | 0.0  | -0.7 |
| 2 | x, y, z | 29.11 | B3LYP/6-31G(d,p) | -0.1 | -0.0 | -0.0  | 0.0  | -0.2 |
| 2 | x, y, z | 25.01 | B3LYP/6-31G(d,p) | -0.5 | -0.0 | -0.0  | 0.0  | -0.6 |
| 2 | x, y, z | 14.56 | B3LYP/6-31G(d,p) | -0.5 | -0.2 | -0.8  | 0.0  | -1.5 |
| 2 | x, y, z | 8.61  | B3LYP/6-31G(d,p) | -2.0 | -3.8 | -15.2 | 17.1 | -7.5 |
| 2 | x, y, z | 14.57 | B3LYP/6-31G(d,p) | -1.1 | -0.1 | -0.3  | 0.0  | -1.5 |
| 2 | x, y, z | 25.03 | B3LYP/6-31G(d,p) | -0.4 | -0.0 | -0.0  | 0.0  | -0.4 |
| 2 | x, y, z | 23.03 | B3LYP/6-31G(d,p) | -0.2 | -0.0 | -0.0  | 0.0  | -0.2 |
| 2 | x, y, z | 16.85 | B3LYP/6-31G(d,p) | 0.5  | -0.0 | -0.1  | 0.0  | 0.4  |

|   |         |       |                  |       |      |       |      |       |
|---|---------|-------|------------------|-------|------|-------|------|-------|
| 2 | x, y, z | 28.72 | B3LYP/6-31G(d,p) | 0.0   | -0.0 | -0.0  | 0.0  | 0.0   |
| 2 | x, y, z | 24.05 | B3LYP/6-31G(d,p) | 0.2   | -0.0 | -0.0  | 0.0  | 0.2   |
| 2 | x, y, z | 17.70 | B3LYP/6-31G(d,p) | 0.2   | -0.0 | -0.1  | 0.0  | 0.2   |
| 2 | x, y, z | 24.88 | B3LYP/6-31G(d,p) | -0.0  | -0.0 | -0.0  | 0.0  | -0.0  |
| 2 | x, y, z | 25.83 | B3LYP/6-31G(d,p) | 0.1   | -0.0 | -0.0  | 0.0  | 0.1   |
| 2 | x, y, z | 21.69 | B3LYP/6-31G(d,p) | 0.2   | -0.0 | -0.0  | 0.0  | 0.2   |
| 2 | x, y, z | 23.45 | B3LYP/6-31G(d,p) | 0.0   | -0.0 | -0.0  | 0.0  | 0.0   |
| 2 | x, y, z | 28.89 | B3LYP/6-31G(d,p) | -0.1  | -0.0 | -0.0  | 0.0  | -0.2  |
| 2 | x, y, z | 21.73 | B3LYP/6-31G(d,p) | 0.0   | -0.0 | -0.0  | 0.0  | -0.0  |
| 2 | x, y, z | 12.92 | B3LYP/6-31G(d,p) | 0.9   | -0.1 | -0.5  | 0.0  | 0.4   |
| 2 | x, y, z | 11.73 | B3LYP/6-31G(d,p) | -0.3  | -0.1 | -0.9  | 0.0  | -1.2  |
| 2 | x, y, z | 19.60 | B3LYP/6-31G(d,p) | -0.8  | -0.0 | -0.1  | 0.0  | -0.9  |
| 2 | x, y, z | 30.11 | B3LYP/6-31G(d,p) | -0.3  | -0.0 | -0.0  | 0.0  | -0.3  |
| 2 | x, y, z | 23.49 | B3LYP/6-31G(d,p) | -0.7  | -0.0 | -0.0  | 0.0  | -0.8  |
| 2 | x, y, z | 11.75 | B3LYP/6-31G(d,p) | -17.4 | -6.4 | -16.1 | 17.9 | -26.2 |

## REFERENCES

- [1] J. F. Grove and J. C. McGowan, "Identity of Griseofulvin and 'Curling-factor,'" *Nature*, vol. 160, pp. 574–574, 1947.
- [2] A. Mahieu, J. Willart, E. Dudognon, "On the Polymorphism of Griseofulvin: Identification of Two Additional Polymorphs," *J. Pharm. Sci.*, vol. 102, no. 7, pp. 2271–2280, 2013, doi: 10.1002/jps.
- [3] X. Ou, S. Li, Y. Chen, H. Rong, A. Li, and M. Lu, "Polymorphism in Griseofulvin: New Story between an Old Drug and Polyethylene Glycol," *Cryst. Growth Des.*, vol. 22, pp. 3778–3785, 2022, doi: 10.1021/acs.cgd.2c00156.

- [4] G. Malmros, A. Wagner, and L. Maron, “(2S,6'R)-7-CHLORO 2',4,6-TRIMETHOXY-6'-METHYL-SPIRO(BENZOFURAN-2(3H), 2-(2')CYCLOHEXENE-3,4'-DIONE, C<sub>17</sub>H<sub>17</sub>ClO<sub>6</sub>,” *Cryst. Struct. Commun.*, vol. 6, pp. 463 - 470, 1977.
- [5] Y. Su, J. Xu, Q. Shi, L. Yu, and T. Cai, “Polymorphism of griseofulvin: Concomitant crystallization from the melt and a single crystal structure of a metastable polymorph with anomalously large thermal expansion,” *Chem. Commun.*, vol. 54, no. 4, pp. 358–361, 2018, doi: 10.1039/c7cc07744k.
- [6] X. Ou, X. Li, H. Rong, L. Yu, and M. Lu, “A general method for cultivating single crystals from melt microdroplets,” *Chem. Commun.*, vol. 56, no. 69, pp. 9950–9953, 2020, doi: 10.1039/d0cc03157g.
- [7] Z. Dauter, A. Hempel, M. Bogucka-Ledochowska, E. Borowski, and W. Dreissig, “Griseofulvin-benzene solvate,” *Eur. Cryst. Meeting*, vol. 5, p. 46, 1979.
- [8] K. C. Cheng, E. L. I. Shefter, T. Srikrishnan, and U. S. P. A. Laboratories, “Crystal structure analysis of the desolvation chloroform solvate of griseofulvin,” *Inter. Jour. Pharm.*, vol. 2, pp. 81–89, 1979.
- [9] S. Aitipamula, P. S. Chow, and R. B. H. Tan, “Solvates of the antifungal drug griseofulvin: Structural, thermochemical and conformational analysis,” *Acta Crystallogr. Sect. B Struct. Sci. Cryst. Eng. Mater.*, vol. 70, no. 1, pp. 54–62, 2014, doi: 10.1107/S2052520613026711.
- [10] K. Shirotani, E. Suzuki, and Y. Morita, “Solvate Formation of Griseofulvin with Alkyl Halide and Alkyl Dihalides,” *Chem. Pharm. Bull.*, no. 10, pp. 4045–4054, 1988.

[11] H. Chen, C. Wang, and C. C. Sun, “Profoundly Improved Plasticity and Tabletability of Griseofulvin by in Situ Solvation and Desolvation during Spherical Crystallization,” *Cryst. Growth Des.*, vol. 19, no. 4, pp. 2350–2357, 2019, doi: 10.1021/acs.cgd.9b00053.
